# Supplementary material for: Earthquake contributions to coastal cliff retreat
Source: Copernicus journal article supplement (doi:10.5194/esurf-11-757-2023), 2023-08-09
Supplement: Supplementary file 1 [file esurf-11-757-2023-supplement.zip]

Archive with 2 entries (2 files):
- Conway_Retreat_Data.csv
- esurf-11-757-2023-supplement-title-page.pdf
