# Supplementary material for: Earthquake contributions to coastal cliff retreat
Source: Copernicus journal article supplement (doi:10.5194/esurf-11-757-2023), 2023-08-09
Supplement: Supplementary file 1 [file esurf-11-757-2023-supplement.zip › Conway_Retreat_Data.csv]

Time_Window	Transect_Location_m	Net_Retreat_m	Retreat_Rate_m_year	Net_uncertainty_m	Rate_uncertainty_m_year
1950-1966	4120	-5.08	-0.32	3.27	0.20
1950-1966	4140	-0.28	-0.02	3.27	0.20
1950-1966	4160	-2.21	-0.14	3.27	0.20
1950-1966	4180	-0.45	-0.03	3.28	0.20
1950-1966	4200	-2.32	-0.15	3.28	0.20
1950-1966	4220	-2.21	-0.14	3.25	0.20
1950-1966	4240	0	0	3.25	0.20
1950-1966	4260	-2.13	-0.14	3.25	0.20
1950-1966	4280	-1.32	-0.08	3.25	0.20
1950-1966	4300	-0.7	-0.04	3.25	0.20
1950-1966	4320	-3.96	-0.25	3.22	0.20
1950-1966	4340	-7.8	-0.5	3.22	0.20
1950-1966	4360	-2.98	-0.19	3.22	0.20
1950-1966	4380	-5.07	-0.32	3.22	0.20
1950-1966	4400	-2.09	-0.13	3.21	0.20
1950-1966	4420	-1.23	-0.08	3.21	0.20
1950-1966	4440	-8.77	-0.56	3.20	0.20
1950-1966	4720	-6.8	-0.43	3.02	0.19
1950-1966	4740	-13.18	-0.84	3.01	0.19
1950-1966	4760	-0.97	-0.06	3.03	0.19
1950-1966	4780	-3	-0.19	3.00	0.19
1950-1966	4800	-0.75	-0.05	3.02	0.19
1950-1966	4840	-3.72	-0.24	2.96	0.19
1950-1966	4860	-0.75	-0.05	2.98	0.19
1950-1966	4880	-0.62	-0.04	2.95	0.18
1950-1966	4900	-2.44	-0.16	2.93	0.18
1950-1966	4920	-1.05	-0.07	2.91	0.18
1950-1966	4940	-1.49	-0.1	2.91	0.18
1950-1966	4960	-2.54	-0.16	2.91	0.18
1950-1966	4980	-1.1	-0.07	2.87	0.18
1950-1966	5000	-4.36	-0.28	2.86	0.18
1950-1966	5020	-0.79	-0.05	2.86	0.18
1950-1966	5040	-6.06	-0.39	2.84	0.18
1950-1966	5060	-9.39	-0.6	2.84	0.18
1950-1966	5080	-9.21	-0.59	2.82	0.18
1950-1966	5160	-2.04	-0.13	2.77	0.17
1950-1966	5180	-12.04	-0.77	2.77	0.17
1950-1966	5200	-6.65	-0.42	2.80	0.17
1950-1966	5220	-12.98	-0.83	2.76	0.17
1950-1966	5240	-9.22	-0.59	2.76	0.17
1950-1966	5260	-13.41	-0.86	2.76	0.17
1950-1966	5280	-8.39	-0.54	2.76	0.17
1950-1966	5300	-10.37	-0.66	2.74	0.17
1950-1966	5320	-7.04	-0.45	2.76	0.17
1950-1966	5340	0	0	2.74	0.17
1950-1966	5360	-9.86	-0.63	2.74	0.17
1950-1966	5380	-5.1	-0.33	2.75	0.17
1950-1966	5400	-8.57	-0.55	2.75	0.17
1950-1966	5460	-0.88	-0.06	2.73	0.17
1950-1966	5480	0	0	2.73	0.17
1950-1966	5500	-2.03	-0.13	2.76	0.17
1950-1966	5660	-7.66	-0.49	2.79	0.17
1950-1966	5760	-9.02	-0.58	2.84	0.18
1950-1966	5820	-0.1	-0.01	2.83	0.18
1950-1966	5840	-12.37	-0.79	2.87	0.18
1950-1966	5900	-15.77	-1.01	2.90	0.18
1950-1966	5940	-11.12	-0.71	2.88	0.18
1950-1966	5960	-2.88	-0.18	2.92	0.18
1950-1966	5980	-5.72	-0.37	2.91	0.18
1950-1966	6020	-13.27	-0.85	2.94	0.18
1950-1966	6040	-11.2	-0.72	2.94	0.18
1950-1966	6060	-7.68	-0.49	2.94	0.18
1950-1966	6080	-7.91	-0.51	2.96	0.19
1950-1966	6100	-23.5	-1.5	2.96	0.19
1950-1966	6140	-28.64	-1.83	2.98	0.19
1950-1966	6160	-23	-1.47	2.95	0.18
1950-1966	6200	0	0	2.95	0.18
1950-1966	6260	-7.95	-0.51	2.93	0.18
1950-1966	6280	-11.7	-0.75	2.96	0.19
1950-1966	6300	-11.09	-0.71	2.96	0.18
1950-1966	6320	-3.92	-0.25	2.96	0.18
1950-1966	6420	-10.22	-0.65	2.92	0.18
1950-1966	6440	1.61	0.1	2.92	0.18
1950-1966	6780	-4.03	-0.26	2.83	0.18
1950-1966	6800	-10.64	-0.68	2.81	0.18
1950-1966	6820	-10.7	-0.68	2.81	0.18
1950-1966	6840	-9.58	-0.61	2.82	0.18
1950-1966	6860	-7.91	-0.51	2.81	0.18
1950-1966	6880	-7.83	-0.5	2.82	0.18
1950-1966	6900	-3.72	-0.24	2.84	0.18
1950-1966	6920	-7.35	-0.47	2.82	0.18
1950-1966	6940	-4.62	-0.29	2.83	0.18
1950-1966	6960	-4.71	-0.3	2.83	0.18
1950-1966	6980	-6.68	-0.43	2.84	0.18
1950-1966	7000	-3.68	-0.24	2.84	0.18
1950-1966	7020	-1.9	-0.12	2.84	0.18
1950-1966	7040	-0.57	-0.04	2.84	0.18
1950-1966	7060	-1.56	-0.1	2.84	0.18
1950-1966	7120	-3.24	-0.21	2.82	0.18
1950-1966	7140	-0.76	-0.05	2.83	0.18
1950-1966	7160	-2.04	-0.13	2.83	0.18
1950-1966	7200	-3.35	-0.21	2.80	0.18
1950-1966	7220	0	0	2.81	0.18
1950-1966	7240	0.05	0	2.80	0.17
1950-1966	7260	-3.79	-0.24	2.79	0.17
1950-1966	7280	-8.45	-0.54	2.78	0.17
1950-1966	7340	0.58	0.04	2.80	0.18
1950-1966	7360	0	0	2.77	0.17
1950-1966	7380	0.54	0.03	2.77	0.17
1950-1966	7520	-11.64	-0.74	2.73	0.17
1950-1966	7540	-12.25	-0.78	2.73	0.17
1950-1966	7560	-2.37	-0.15	2.73	0.17
1950-1966	7580	-7.21	-0.46	2.71	0.17
1950-1966	7620	0.29	0.02	2.71	0.17
1950-1966	7640	-1.23	-0.08	2.71	0.17
1950-1966	7660	-5.5	-0.35	2.71	0.17
1950-1966	7680	-14.5	-0.93	2.71	0.17
1950-1966	7700	-21.24	-1.36	2.71	0.17
1950-1966	7740	-18.04	-1.15	2.72	0.17
1950-1966	7760	-3.45	-0.22	2.71	0.17
1950-1966	7780	-0.64	-0.04	2.70	0.17
1950-1966	7800	0.16	0.01	2.71	0.17
1950-1966	7820	-2.79	-0.18	2.71	0.17
1950-1966	7840	-1.75	-0.11	2.70	0.17
1950-1966	7860	-1.56	-0.1	2.70	0.17
1950-1966	7880	-1.58	-0.1	2.70	0.17
1950-1966	7900	-0.85	-0.05	2.70	0.17
1950-1966	7920	-3.22	-0.21	2.70	0.17
1950-1966	7940	-1.12	-0.07	2.70	0.17
1950-1966	8000	-9.49	-0.61	2.69	0.17
1950-1966	8020	-12.12	-0.77	2.70	0.17
1950-1966	8040	-14.99	-0.96	2.70	0.17
1950-1966	8060	-21.48	-1.37	2.69	0.17
1950-1966	8080	-3.58	-0.23	2.69	0.17
1950-1966	8100	-1.82	-0.12	2.69	0.17
1950-1966	8120	-1.47	-0.09	2.69	0.17
1950-1966	8140	-10.34	-0.66	2.69	0.17
1950-1966	8200	-17.81	-1.14	2.67	0.17
1950-1966	8220	-22.47	-1.44	2.67	0.17
1950-1966	8240	-18.06	-1.15	2.67	0.17
1950-1966	8260	-17.45	-1.11	2.67	0.17
1950-1966	8280	-17.86	-1.14	2.65	0.17
1950-1966	8300	-4.64	-0.3	2.65	0.17
1950-1966	8320	-1.06	-0.07	2.64	0.17
1966-1975	500	0.6	0.06	2.72	0.30
1966-1975	640	0.05	0.01	2.67	0.30
1966-1975	660	-2.8	-0.3	2.68	0.30
1966-1975	820	-2.42	-0.26	2.63	0.29
1966-1975	960	0.53	0.06	2.63	0.29
1966-1975	980	0	0	2.62	0.29
1966-1975	1080	0	0	2.61	0.29
1966-1975	1220	-2.98	-0.32	2.61	0.29
1966-1975	1240	0.55	0.06	2.61	0.29
1966-1975	1260	1.43	0.15	2.60	0.29
1966-1975	1280	0.23	0.02	2.60	0.29
1966-1975	1300	0	0	2.60	0.29
1966-1975	1320	-2.25	-0.24	2.60	0.29
1966-1975	1560	-1.09	-0.12	2.57	0.29
1966-1975	1580	-0.78	-0.08	2.57	0.29
1966-1975	1640	-2.88	-0.3	2.54	0.28
1966-1975	1660	-2.04	-0.22	2.53	0.28
1966-1975	1680	-1.91	-0.2	2.53	0.28
1966-1975	1700	0	0	2.52	0.28
1966-1975	1760	0.53	0.06	2.48	0.28
1966-1975	1780	-2.29	-0.24	2.48	0.28
1966-1975	1800	-0.55	-0.06	2.46	0.27
1966-1975	1820	-6.72	-0.71	2.46	0.27
1966-1975	1840	0.36	0.04	2.46	0.27
1966-1975	1860	-6.29	-0.67	2.44	0.27
1966-1975	2080	-2.48	-0.26	2.31	0.26
1966-1975	2100	-0.91	-0.1	2.28	0.25
1966-1975	2120	0.46	0.05	2.23	0.25
1966-1975	2140	-0.17	-0.02	2.23	0.25
1966-1975	2200	-0.14	-0.01	2.18	0.24
1966-1975	2220	1.48	0.16	2.18	0.24
1966-1975	2240	-0.22	-0.02	2.10	0.23
1966-1975	2260	-1.5	-0.16	2.10	0.23
1966-1975	2280	-0.33	-0.04	2.10	0.23
1966-1975	2360	-0.54	-0.06	2.01	0.22
1966-1975	2380	0.39	0.04	2.00	0.22
1966-1975	2400	1.01	0.11	2.00	0.22
1966-1975	2420	0.73	0.08	1.93	0.21
1966-1975	2440	0.98	0.1	1.92	0.21
1966-1975	2460	-0.99	-0.1	1.92	0.21
1966-1975	2480	0	0	1.92	0.21
1966-1975	2500	-2.39	-0.25	1.88	0.21
1966-1975	2520	0.59	0.06	1.88	0.21
1966-1975	2540	-1.12	-0.12	1.85	0.21
1966-1975	2560	0	0	1.81	0.20
1966-1975	2580	-0.58	-0.06	1.81	0.20
1966-1975	2640	1.1	0.12	1.76	0.20
1966-1975	2660	-0.72	-0.08	1.76	0.20
1966-1975	2680	-0.33	-0.03	1.72	0.19
1966-1975	2700	-3.71	-0.39	1.72	0.19
1966-1975	2720	-5.47	-0.58	1.70	0.19
1966-1975	2740	0.78	0.08	1.70	0.19
1966-1975	2760	-2.95	-0.31	1.67	0.19
1966-1975	2780	-2.75	-0.29	1.67	0.19
1966-1975	2800	0	0	1.66	0.18
1966-1975	2840	0.25	0.03	1.63	0.18
1966-1975	2860	0.55	0.06	1.63	0.18
1966-1975	2900	0.47	0.05	1.60	0.18
1966-1975	2920	0.25	0.03	1.60	0.18
1966-1975	2980	-1.13	-0.12	1.59	0.18
1966-1975	3000	0.21	0.02	1.57	0.17
1966-1975	3020	0.77	0.08	1.57	0.17
1966-1975	3040	0	0	1.58	0.18
1966-1975	3060	-1.89	-0.2	1.57	0.17
1966-1975	3080	-0.02	0	1.58	0.18
1966-1975	3100	0	0	1.57	0.17
1966-1975	3120	-0.22	-0.02	1.58	0.18
1966-1975	3140	-0.01	0	1.58	0.18
1966-1975	3160	-3.11	-0.33	1.55	0.17
1966-1975	3180	-1.36	-0.14	1.55	0.17
1966-1975	3200	0.54	0.06	1.51	0.17
1966-1975	3220	-2.1	-0.22	1.51	0.17
1966-1975	3240	-1.8	-0.19	1.51	0.17
1966-1975	3260	0.03	0	1.45	0.16
1966-1975	3280	-1.72	-0.18	1.45	0.16
1966-1975	3300	0	0	1.48	0.16
1966-1975	3320	0.26	0.03	1.48	0.16
1966-1975	3340	-1.04	-0.11	1.47	0.16
1966-1975	3520	0	0	1.55	0.17
1966-1975	3560	0.81	0.09	1.55	0.17
1966-1975	3660	1.35	0.14	1.63	0.18
1966-1975	3680	0.72	0.08	1.63	0.18
1966-1975	3700	0.73	0.08	1.66	0.18
1966-1975	3740	-1.37	-0.14	1.66	0.18
1966-1975	3760	0.55	0.06	1.67	0.19
1966-1975	3780	-0.66	-0.07	1.67	0.19
1966-1975	3800	-1.23	-0.13	1.69	0.19
1966-1975	3840	-1.12	-0.12	1.69	0.19
1966-1975	3860	-0.66	-0.07	1.71	0.19
1966-1975	3880	0.84	0.09	1.71	0.19
1966-1975	3900	0.68	0.07	1.71	0.19
1966-1975	3920	0	0	1.72	0.19
1966-1975	3940	0.18	0.02	1.72	0.19
1966-1975	3960	0.48	0.05	1.73	0.19
1966-1975	3980	0.61	0.06	1.74	0.19
1966-1975	4020	1.18	0.12	1.74	0.19
1966-1975	4040	-0.25	-0.03	1.74	0.19
1966-1975	4060	-0.06	-0.01	1.74	0.19
1966-1975	4080	-1.19	-0.13	1.74	0.19
1966-1975	4100	-1.74	-0.18	1.75	0.19
1966-1975	4120	0	0	1.76	0.20
1966-1975	4140	0.14	0.01	1.76	0.20
1966-1975	4160	-0.19	-0.02	1.76	0.20
1966-1975	4180	0.45	0.05	1.77	0.20
1966-1975	4200	0.17	0.02	1.77	0.20
1966-1975	4220	0.88	0.09	1.77	0.20
1966-1975	4240	-0.51	-0.05	1.79	0.20
1966-1975	4260	0.09	0.01	1.79	0.20
1966-1975	4280	-0.85	-0.09	1.79	0.20
1966-1975	4300	-4.52	-0.48	1.81	0.20
1966-1975	4320	-4.69	-0.5	1.81	0.20
1966-1975	4340	-2.36	-0.25	1.81	0.20
1966-1975	4360	-1.59	-0.17	1.83	0.20
1966-1975	4380	-2.2	-0.23	1.83	0.20
1966-1975	4400	-2.94	-0.31	1.84	0.20
1966-1975	4420	1.52	0.16	1.85	0.21
1966-1975	4440	0	0	1.85	0.21
1966-1975	4700	0.23	0.02	1.99	0.22
1966-1975	4720	-4.83	-0.51	1.99	0.22
1966-1975	4740	-1.12	-0.12	2.02	0.22
1966-1975	4780	0.27	0.03	2.02	0.22
1966-1975	4800	-2.76	-0.29	2.05	0.23
1966-1975	4840	0.46	0.05	2.05	0.23
1966-1975	4860	-0.14	-0.01	2.07	0.23
1966-1975	4880	-0.53	-0.06	2.07	0.23
1966-1975	4900	0.56	0.06	2.08	0.23
1966-1975	4920	0.04	0	2.08	0.23
1966-1975	4940	0.33	0.03	2.08	0.23
1966-1975	4960	-0.06	-0.01	2.08	0.23
1966-1975	4980	-0.31	-0.03	2.10	0.23
1966-1975	5000	-1.14	-0.12	2.11	0.23
1966-1975	5020	-0.52	-0.05	2.11	0.23
1966-1975	5040	-3.93	-0.42	2.11	0.23
1966-1975	5060	-3.43	-0.36	2.14	0.24
1966-1975	5080	0	0	2.14	0.24
1966-1975	5160	0.04	0	2.17	0.24
1966-1975	5180	-1.76	-0.19	2.17	0.24
1966-1975	5200	-7.91	-0.84	2.20	0.24
1966-1975	5220	-2.88	-0.3	2.21	0.25
1966-1975	5240	-8.89	-0.94	2.21	0.25
1966-1975	5260	-1.04	-0.11	2.23	0.25
1966-1975	5280	-4.52	-0.48	2.25	0.25
1966-1975	5300	-6.86	-0.73	2.25	0.25
1966-1975	5320	-1.52	-0.16	2.27	0.25
1966-1975	5340	-2.57	-0.27	2.30	0.26
1966-1975	5360	-0.6	-0.06	2.30	0.26
1966-1975	5380	-0.29	-0.03	2.34	0.26
1966-1975	5400	-2.86	-0.3	2.35	0.26
1966-1975	5460	0.67	0.07	2.40	0.27
1966-1975	5480	0	0	2.40	0.27
1966-1975	5500	0	0	2.46	0.27
1966-1975	5660	-1.41	-0.15	2.65	0.29
1966-1975	5760	-0.82	-0.09	2.83	0.31
1966-1975	5820	-27.6	-2.92	2.88	0.32
1966-1975	5840	-2.38	-0.25	2.92	0.32
1966-1975	5900	-2.54	-0.27	3.00	0.33
1966-1975	5940	-2.96	-0.31	3.03	0.34
1966-1975	5960	-9.51	-1.01	3.06	0.34
1966-1975	5980	-10.51	-1.11	3.11	0.35
1966-1975	6020	1.14	0.12	3.18	0.35
1966-1975	6040	1.55	0.16	3.18	0.35
1966-1975	6060	-0.17	-0.02	3.18	0.35
1966-1975	6080	0	0	3.24	0.36
1966-1975	6100	0.84	0.09	3.24	0.36
1966-1975	6120	0	0	3.26	0.36
1966-1975	6140	-16.17	-1.71	3.26	0.36
1966-1975	6160	-5	-0.53	3.24	0.36
1966-1975	6200	-2.19	-0.23	3.22	0.36
1966-1975	6260	-8.08	-0.86	3.22	0.36
1966-1975	6280	-5.51	-0.58	3.25	0.36
1966-1975	6300	-14.82	-1.57	3.26	0.36
1966-1975	6320	-11.03	-1.17	3.26	0.36
1966-1975	6420	-3.83	-0.41	3.18	0.35
1966-1975	6440	-0.43	-0.05	3.18	0.35
1966-1975	6500	-2.9	-0.31	3.15	0.35
1966-1975	6520	0.71	0.08	3.13	0.35
1966-1975	6540	-3.76	-0.4	3.08	0.34
1966-1975	6620	-2.11	-0.22	3.00	0.33
1966-1975	6640	-1.81	-0.19	3.00	0.33
1966-1975	6660	-0.29	-0.03	2.98	0.33
1966-1975	6680	0.19	0.02	2.96	0.33
1966-1975	6780	-0.55	-0.06	2.90	0.32
1966-1975	6800	-3.22	-0.34	2.87	0.32
1966-1975	6820	-2.12	-0.22	2.87	0.32
1966-1975	6840	-2.7	-0.29	2.84	0.32
1966-1975	6860	-5.04	-0.53	2.83	0.31
1966-1975	6880	-4.81	-0.51	2.83	0.31
1966-1975	6900	-2.73	-0.29	2.82	0.31
1966-1975	6920	0	0	2.81	0.31
1966-1975	6940	-1.54	-0.16	2.79	0.31
1966-1975	6960	-2.16	-0.23	2.79	0.31
1966-1975	6980	0	0	2.79	0.31
1966-1975	7000	-1.53	-0.16	2.78	0.31
1966-1975	7020	-4.08	-0.43	2.78	0.31
1966-1975	7040	-2.71	-0.29	2.76	0.31
1966-1975	7060	0	0	2.75	0.31
1966-1975	7120	0	0	2.74	0.30
1966-1975	7140	0.65	0.07	2.75	0.31
1966-1975	7160	0.32	0.03	2.75	0.31
1966-1975	7200	1.08	0.11	2.74	0.30
1966-1975	7220	-1.07	-0.11	2.74	0.30
1966-1975	7240	-3.64	-0.39	2.74	0.30
1966-1975	7260	-2.95	-0.31	2.75	0.31
1966-1975	7280	0	0	2.74	0.30
1966-1975	7340	0	0	2.77	0.31
1966-1975	7360	0	0	2.77	0.31
1966-1975	7380	0	0	2.77	0.31
1966-1975	7520	-3.85	-0.41	2.81	0.31
1966-1975	7540	-11.25	-1.19	2.81	0.31
1966-1975	7560	-2.92	-0.31	2.83	0.31
1966-1975	7580	0	0	2.84	0.32
1966-1975	7620	-0.53	-0.06	2.86	0.32
1966-1975	7640	-5.25	-0.56	2.86	0.32
1966-1975	7660	-10.05	-1.06	2.86	0.32
1966-1975	7680	-6.12	-0.65	2.87	0.32
1966-1975	7700	0	0	2.87	0.32
1966-1975	7740	-7.74	-0.82	2.89	0.32
1966-1975	7760	-2.72	-0.29	2.89	0.32
1966-1975	7780	-3.44	-0.36	2.89	0.32
1966-1975	7800	-7.93	-0.84	2.90	0.32
1966-1975	7820	-13.25	-1.4	2.90	0.32
1966-1975	7840	-11.21	-1.19	2.90	0.32
1966-1975	7860	-3.05	-0.32	2.90	0.32
1966-1975	7880	-2.91	-0.31	2.90	0.32
1966-1975	7900	-6.55	-0.69	2.90	0.32
1966-1975	7920	-2.11	-0.22	2.90	0.32
1966-1975	7940	-3.13	-0.33	2.90	0.32
1966-1975	8000	-7.8	-0.83	2.89	0.32
1966-1975	8020	-6.07	-0.64	2.89	0.32
1966-1975	8040	-9.91	-1.05	2.89	0.32
1966-1975	8060	-4.76	-0.5	2.89	0.32
1966-1975	8080	-17.07	-1.81	2.89	0.32
1966-1975	8100	-11.37	-1.2	2.89	0.32
1966-1975	8120	-12.58	-1.33	2.88	0.32
1966-1975	8140	-12.61	-1.34	2.88	0.32
1966-1975	8200	-17.59	-1.86	2.86	0.32
1966-1975	8220	-26.79	-2.84	2.86	0.32
1966-1975	8240	-10.88	-1.15	2.86	0.32
1966-1975	8260	-9.47	-1	2.85	0.32
1966-1975	8280	-13.68	-1.45	2.84	0.32
1966-1975	8300	-10.7	-1.13	2.84	0.32
1966-1975	8320	-13.19	-1.4	2.83	0.31
1975-1985	500	-1.36	-0.15	1.76	0.18
1975-1985	640	-6.34	-0.68	1.79	0.18
1975-1985	660	-0.34	-0.04	1.79	0.18
1975-1985	960	0	0	1.89	0.19
1975-1985	980	0	0	1.89	0.19
1975-1985	1220	0.3	0.03	1.99	0.20
1975-1985	1240	-1.59	-0.17	1.99	0.20
1975-1985	1280	-0.35	-0.04	2.03	0.20
1975-1985	1300	-7.76	-0.83	2.02	0.20
1975-1985	1320	-0.53	-0.06	2.00	0.20
1975-1985	1560	1.53	0.16	1.98	0.20
1975-1985	1580	1.29	0.14	1.98	0.20
1975-1985	1640	-2.25	-0.24	1.96	0.20
1975-1985	1660	1.24	0.13	1.96	0.20
1975-1985	1680	1.1	0.12	1.94	0.19
1975-1985	1700	-1.79	-0.19	1.92	0.19
1975-1985	1760	0.37	0.04	1.92	0.19
1975-1985	1780	0.23	0.02	1.92	0.19
1975-1985	1800	-4.8	-0.52	1.91	0.19
1975-1985	1820	-2.44	-0.26	1.91	0.19
1975-1985	1840	-1.46	-0.16	1.91	0.19
1975-1985	1860	-0.3	-0.03	1.88	0.19
1975-1985	2080	0.1	0.01	1.85	0.19
1975-1985	2100	1.81	0.19	1.86	0.19
1975-1985	2120	-0.18	-0.02	1.85	0.19
1975-1985	2140	-0.31	-0.03	1.81	0.18
1975-1985	2200	0.2	0.02	1.80	0.18
1975-1985	2220	-1.14	-0.12	1.79	0.18
1975-1985	2240	-0.24	-0.03	1.79	0.18
1975-1985	2260	0.48	0.05	1.75	0.17
1975-1985	2280	-1.2	-0.13	1.73	0.17
1975-1985	2360	-0.39	-0.04	1.70	0.17
1975-1985	2380	0.66	0.07	1.69	0.17
1975-1985	2400	0.02	0	1.69	0.17
1975-1985	2420	-0.2	-0.02	1.69	0.17
1975-1985	2440	0.05	0.01	1.65	0.17
1975-1985	2460	-1.95	-0.21	1.65	0.17
1975-1985	2480	0	0	1.65	0.17
1975-1985	2500	-2.15	-0.23	1.65	0.16
1975-1985	2520	-0.91	-0.1	1.56	0.16
1975-1985	2540	-5.95	-0.64	1.56	0.16
1975-1985	2560	-0.53	-0.06	1.56	0.16
1975-1985	2580	-5.96	-0.64	1.56	0.16
1975-1985	2620	-0.73	-0.08	1.51	0.15
1975-1985	2640	0	0	1.51	0.15
1975-1985	2660	-3.38	-0.36	1.51	0.15
1975-1985	2680	-5.65	-0.61	1.51	0.15
1975-1985	2700	-0.2	-0.02	1.46	0.15
1975-1985	2720	-5.67	-0.61	1.46	0.15
1975-1985	2740	-1.92	-0.21	1.43	0.14
1975-1985	2760	-0.9	-0.1	1.43	0.14
1975-1985	2780	-0.5	-0.05	1.39	0.14
1975-1985	2800	-5.42	-0.58	1.39	0.14
1975-1985	2860	0	0	1.34	0.13
1975-1985	2900	-0.47	-0.05	1.33	0.13
1975-1985	2920	0.31	0.03	1.33	0.13
1975-1985	2980	-5.87	-0.63	1.30	0.13
1975-1985	3000	-5.3	-0.57	1.30	0.13
1975-1985	3020	-8.58	-0.92	1.27	0.13
1975-1985	3040	-3.68	-0.4	1.27	0.13
1975-1985	3060	-2.02	-0.22	1.27	0.13
1975-1985	3080	-0.42	-0.05	1.27	0.13
1975-1985	3100	-3.46	-0.37	1.25	0.12
1975-1985	3120	-1.1	-0.12	1.25	0.12
1975-1985	3140	-0.35	-0.04	1.27	0.13
1975-1985	3160	-3.42	-0.37	1.27	0.13
1975-1985	3180	0.4	0.04	1.26	0.13
1975-1985	3200	-1.87	-0.2	1.28	0.13
1975-1985	3220	-0.94	-0.1	1.28	0.13
1975-1985	3240	-1.14	-0.12	1.28	0.13
1975-1985	3260	-0.22	-0.02	1.26	0.13
1975-1985	3280	-11.35	-1.22	1.29	0.13
1975-1985	3300	-25.34	-2.72	1.30	0.13
1975-1985	3320	-15.31	-1.65	1.30	0.13
1975-1985	3340	0	0	1.30	0.13
1975-1985	3360	-1.81	-0.19	1.31	0.13
1975-1985	3380	-1.01	-0.11	1.33	0.13
1975-1985	3560	-0.81	-0.09	1.45	0.15
1975-1985	3660	0.85	0.09	1.53	0.15
1975-1985	3680	-0.72	-0.08	1.53	0.15
1975-1985	3700	0.33	0.04	1.58	0.16
1975-1985	3740	-2.68	-0.29	1.58	0.16
1975-1985	3760	-9.16	-0.98	1.58	0.16
1975-1985	3780	-6.83	-0.73	1.58	0.16
1975-1985	3800	-2.38	-0.26	1.61	0.16
1975-1985	3840	-1.53	-0.16	1.61	0.16
1975-1985	3860	-0.42	-0.05	1.61	0.16
1975-1985	3880	-0.84	-0.09	1.61	0.16
1975-1985	3900	-0.4	-0.04	1.63	0.16
1975-1985	3920	-0.42	-0.04	1.63	0.16
1975-1985	3940	-3.35	-0.36	1.63	0.16
1975-1985	3960	-9.42	-1.01	1.65	0.17
1975-1985	3980	-10.22	-1.1	1.65	0.17
1975-1985	4020	-0.7	-0.08	1.63	0.16
1975-1985	4040	-0.26	-0.03	1.63	0.16
1975-1985	4060	0.25	0.03	1.64	0.16
1975-1985	4080	-0.09	-0.01	1.64	0.16
1975-1985	4100	0.66	0.07	1.65	0.16
1975-1985	4120	0	0	1.65	0.16
1975-1985	4140	-0.14	-0.02	1.65	0.17
1975-1985	4160	0	0	1.65	0.17
1975-1985	4180	0.21	0.02	1.63	0.16
1975-1985	4200	0	0	1.63	0.16
1975-1985	4220	-2.71	-0.29	1.63	0.16
1975-1985	4240	-2.51	-0.27	1.64	0.16
1975-1985	4260	-3.9	-0.42	1.64	0.16
1975-1985	4280	-5.72	-0.61	1.64	0.16
1975-1985	4300	-2.45	-0.26	1.64	0.16
1975-1985	4320	-2.11	-0.23	1.64	0.16
1975-1985	4340	1.25	0.13	1.64	0.16
1975-1985	4360	-0.59	-0.06	1.66	0.17
1975-1985	4380	-2.34	-0.25	1.66	0.17
1975-1985	4400	-1.28	-0.14	1.63	0.16
1975-1985	4420	-2.58	-0.28	1.64	0.16
1975-1985	4760	0	0	1.68	0.17
1975-1985	4780	0	0	1.70	0.17
1975-1985	4800	-0.27	-0.03	1.69	0.17
1975-1985	4840	-0.17	-0.02	1.70	0.17
1975-1985	4860	-0.35	-0.04	1.70	0.17
1975-1985	4880	-0.19	-0.02	1.69	0.17
1975-1985	4900	0.35	0.04	1.71	0.17
1975-1985	4920	-0.04	0	1.70	0.17
1975-1985	4940	-0.33	-0.04	1.70	0.17
1975-1985	4960	-0.39	-0.04	1.71	0.17
1975-1985	4980	-0.3	-0.03	1.72	0.17
1975-1985	5000	-12.01	-1.29	1.71	0.17
1975-1985	5020	-7.48	-0.8	1.71	0.17
1975-1985	5040	-1.63	-0.18	1.71	0.17
1975-1985	5060	-0.79	-0.08	1.72	0.17
1975-1985	5080	-7.03	-0.76	1.72	0.17
1975-1985	5160	-3.16	-0.34	1.74	0.17
1975-1985	5180	-6.86	-0.74	1.74	0.17
1975-1985	5200	-5.8	-0.62	1.74	0.17
1975-1985	5220	-7.95	-0.85	1.75	0.17
1975-1985	5240	-0.63	-0.07	1.75	0.18
1975-1985	5260	-1.42	-0.15	1.75	0.18
1975-1985	5280	-5.79	-0.62	1.77	0.18
1975-1985	5300	-1.01	-0.11	1.77	0.18
1975-1985	5320	-0.47	-0.05	1.77	0.18
1975-1985	5340	-0.17	-0.02	1.79	0.18
1975-1985	5360	-4.91	-0.53	1.79	0.18
1975-1985	5380	-4.53	-0.49	1.81	0.18
1975-1985	5400	-5.07	-0.54	1.81	0.18
1975-1985	5660	-9.16	-0.98	2.00	0.20
1975-1985	5760	-7.03	-0.76	2.12	0.21
1975-1985	5820	0	0	2.18	0.22
1975-1985	6020	-5.31	-0.57	2.40	0.24
1975-1985	6040	-9.44	-1.01	2.40	0.24
1975-1985	6060	-10.41	-1.12	2.41	0.24
1975-1985	6080	-6.37	-0.68	2.45	0.25
1975-1985	6100	0.39	0.04	2.45	0.25
1975-1985	6120	-1.4	-0.15	2.50	0.25
1975-1985	6140	-0.69	-0.07	2.47	0.25
1975-1985	6160	-6.95	-0.75	2.47	0.25
1975-1985	6200	0.31	0.03	2.45	0.25
1975-1985	6300	-1.07	-0.12	2.50	0.25
1975-1985	6320	-3.47	-0.37	2.50	0.25
1975-1985	6420	-1.78	-0.19	2.47	0.25
1975-1985	6440	-0.46	-0.05	2.47	0.25
1975-1985	6460	-1.75	-0.19	2.41	0.24
1975-1985	6520	0.43	0.05	2.45	0.25
1975-1985	6540	0.53	0.06	2.41	0.24
1975-1985	6620	-7.3	-0.78	2.35	0.24
1975-1985	6640	-8.33	-0.9	2.36	0.24
1975-1985	6660	-11.79	-1.27	2.36	0.24
1975-1985	6680	-6.47	-0.7	2.32	0.23
1975-1985	6700	-1.64	-0.18	2.32	0.23
1975-1985	6900	-0.27	-0.03	2.14	0.21
1975-1985	6920	-4.23	-0.45	2.14	0.21
1975-1985	7000	0.3	0.03	2.08	0.21
1975-1985	7020	0.05	0.01	2.08	0.21
1975-1985	7040	-1.62	-0.17	2.07	0.21
1975-1985	7060	-6.51	-0.7	2.03	0.20
1975-1985	7140	-0.15	-0.02	2.01	0.20
1975-1985	7160	-0.43	-0.05	2.00	0.20
1975-1985	7200	-5.22	-0.56	1.99	0.20
1975-1985	7220	-1.85	-0.2	1.97	0.20
1975-1985	7240	-0.91	-0.1	1.97	0.20
1975-1985	7260	0	0	1.96	0.20
1975-1985	7280	-3.19	-0.34	1.96	0.20
1975-1985	7340	-0.45	-0.05	1.96	0.20
1975-1985	7360	0	0	1.95	0.20
1975-1985	7380	1.17	0.13	1.99	0.20
1975-1985	7520	-3.33	-0.36	2.03	0.20
1975-1985	7540	-4.8	-0.52	2.03	0.20
1975-1985	7560	-1.11	-0.12	2.08	0.21
1975-1985	7620	0	0	2.08	0.21
1975-1985	7640	-6.18	-0.66	2.13	0.21
1975-1985	7660	-3.55	-0.38	2.13	0.21
1975-1985	7680	0	0	2.13	0.21
1975-1985	7700	-1.73	-0.19	2.13	0.21
1975-1985	7740	-2.2	-0.24	2.18	0.22
1975-1985	7760	-5.09	-0.55	2.18	0.22
1975-1985	7780	-6.1	-0.66	2.18	0.22
1975-1985	7800	-6.82	-0.73	2.22	0.22
1975-1985	7820	0	0	2.22	0.22
1975-1985	7840	-2.13	-0.23	2.22	0.22
1975-1985	7860	-4.07	-0.44	2.22	0.22
1975-1985	7880	-5.16	-0.55	2.22	0.22
1975-1985	7900	-1.73	-0.19	2.21	0.22
1975-1985	7920	-4.2	-0.45	2.22	0.22
1975-1985	8000	-0.56	-0.06	2.22	0.22
1975-1985	8020	0.71	0.08	2.22	0.22
1975-1985	8040	-2.99	-0.32	2.23	0.22
1975-1985	8060	-2.55	-0.27	2.22	0.22
1975-1985	8080	-1.04	-0.11	2.22	0.22
1975-1985	8100	-0.72	-0.08	2.22	0.22
1975-1985	8120	-7.58	-0.82	2.22	0.22
1985-2004	500	0.32	0.02	1.74	0.09
1985-2004	640	-2.13	-0.11	1.77	0.09
1985-2004	660	-1.41	-0.07	1.77	0.09
1985-2004	960	-1.12	-0.06	1.87	0.10
1985-2004	1220	-4.19	-0.22	1.98	0.10
1985-2004	1240	1.41	0.07	1.98	0.10
1985-2004	1260	-0.96	-0.05	2.03	0.11
1985-2004	1280	1.06	0.05	2.03	0.11
1985-2004	1300	-0.06	0	2.02	0.11
1985-2004	1320	-0.42	-0.02	2.00	0.11
1985-2004	1560	1.01	0.05	2.03	0.11
1985-2004	1580	-1.81	-0.09	2.03	0.11
1985-2004	1640	1.4	0.07	2.04	0.11
1985-2004	1660	-0.28	-0.01	2.04	0.11
1985-2004	1680	-0.85	-0.04	2.02	0.11
1985-2004	1700	-0.56	-0.03	2.02	0.11
1985-2004	1760	-1.99	-0.1	2.03	0.11
1985-2004	1780	0	0	2.03	0.11
1985-2004	1800	0.34	0.02	2.03	0.11
1985-2004	1820	0	0	2.03	0.11
1985-2004	1840	0.26	0.01	2.03	0.11
1985-2004	2080	0.77	0.04	2.05	0.11
1985-2004	2120	-5.18	-0.27	2.06	0.11
1985-2004	2140	-2.15	-0.11	2.03	0.11
1985-2004	2200	1.39	0.07	2.03	0.11
1985-2004	2220	0.2	0.01	2.03	0.11
1985-2004	2240	0.56	0.03	2.04	0.11
1985-2004	2260	-2.41	-0.13	2.00	0.11
1985-2004	2280	-0.91	-0.05	1.99	0.10
1985-2004	2360	1.05	0.05	1.98	0.10
1985-2004	2380	0.52	0.03	1.98	0.10
1985-2004	2400	0.34	0.02	1.98	0.10
1985-2004	2420	1.85	0.1	1.98	0.10
1985-2004	2440	0	0	1.95	0.10
1985-2004	2460	0.41	0.02	1.96	0.10
1985-2004	2480	-0.11	-0.01	1.96	0.10
1985-2004	2500	1.01	0.05	1.96	0.10
1985-2004	2520	-1.36	-0.07	1.89	0.10
1985-2004	2540	0.59	0.03	1.89	0.10
1985-2004	2560	1.08	0.06	1.89	0.10
1985-2004	2640	0	0	1.85	0.10
1985-2004	2660	0.47	0.02	1.85	0.10
1985-2004	2680	-0.35	-0.02	1.85	0.10
1985-2004	2700	-2.43	-0.13	1.82	0.10
1985-2004	2740	-1.15	-0.06	1.79	0.09
1985-2004	2760	0.33	0.02	1.79	0.09
1985-2004	2780	-2.32	-0.12	1.76	0.09
1985-2004	2800	1.04	0.05	1.75	0.09
1985-2004	2860	-0.65	-0.03	1.71	0.09
1985-2004	2900	1.36	0.07	1.69	0.09
1985-2004	2920	0.06	0	1.68	0.09
1985-2004	2980	-2.48	-0.13	1.63	0.09
1985-2004	3020	-1.45	-0.08	1.59	0.08
1985-2004	3040	-1.95	-0.1	1.57	0.08
1985-2004	3060	0	0	1.57	0.08
1985-2004	3080	0.86	0.04	1.55	0.08
1985-2004	3100	0.73	0.04	1.53	0.08
1985-2004	3140	-3.69	-0.19	1.56	0.08
1985-2004	3160	0.67	0.03	1.61	0.08
1985-2004	3220	0.37	0.02	1.76	0.09
1985-2004	3240	-0.16	-0.01	1.86	0.10
1985-2004	3260	-0.17	-0.01	1.86	0.10
1985-2004	3280	-2.01	-0.1	1.95	0.10
1985-2004	3300	0.79	0.04	1.95	0.10
1985-2004	3320	0.65	0.03	1.95	0.10
1985-2004	3340	-2.09	-0.11	1.92	0.10
1985-2004	3360	-1.94	-0.1	1.93	0.10
1985-2004	3560	0	0	1.97	0.10
1985-2004	3660	-1.61	-0.08	1.99	0.10
1985-2004	3680	-2.23	-0.12	1.99	0.10
1985-2004	3700	0	0	2.02	0.11
1985-2004	3740	-3.41	-0.18	2.02	0.11
1985-2004	3760	-3.52	-0.18	2.02	0.11
1985-2004	3780	-5.04	-0.26	2.01	0.11
1985-2004	3800	0	0	2.03	0.11
1985-2004	3840	0.5	0.03	2.03	0.11
1985-2004	3860	0.02	0	2.03	0.11
1985-2004	3880	1.44	0.07	2.03	0.11
1985-2004	3900	0.6	0.03	2.05	0.11
1985-2004	3920	1.97	0.1	2.05	0.11
1985-2004	3940	-2.17	-0.11	2.05	0.11
1985-2004	3960	0.17	0.01	2.06	0.11
1985-2004	3980	0.61	0.03	2.06	0.11
1985-2004	4020	-0.69	-0.04	2.04	0.11
1985-2004	4040	0	0	2.04	0.11
1985-2004	4060	-0.89	-0.05	2.05	0.11
1985-2004	4080	-0.71	-0.04	2.05	0.11
1985-2004	4100	-3.27	-0.17	2.05	0.11
1985-2004	4120	-0.57	-0.03	2.05	0.11
1985-2004	4140	-0.73	-0.04	2.06	0.11
1985-2004	4160	0.77	0.04	2.06	0.11
1985-2004	4180	1.28	0.07	2.04	0.11
1985-2004	4200	1.61	0.08	2.05	0.11
1985-2004	4220	-0.54	-0.03	2.04	0.11
1985-2004	4240	-1.62	-0.08	2.04	0.11
1985-2004	4260	-0.65	-0.03	2.04	0.11
1985-2004	4280	-1.19	-0.06	2.05	0.11
1985-2004	4300	-3.03	-0.16	2.04	0.11
1985-2004	4320	-5.06	-0.26	2.04	0.11
1985-2004	4340	-4.97	-0.26	2.05	0.11
1985-2004	4360	-1.92	-0.1	2.05	0.11
1985-2004	4380	-0.74	-0.04	2.06	0.11
1985-2004	4400	-4.5	-0.23	2.04	0.11
1985-2004	4420	-4.79	-0.25	2.05	0.11
1985-2004	4440	-6.14	-0.32	2.06	0.11
1985-2004	4760	-0.54	-0.03	2.08	0.11
1985-2004	4780	0	0	2.09	0.11
1985-2004	4800	-0.2	-0.01	2.08	0.11
1985-2004	4840	-0.2	-0.01	2.10	0.11
1985-2004	4860	-0.24	-0.01	2.10	0.11
1985-2004	4880	-0.35	-0.02	2.07	0.11
1985-2004	4900	-0.49	-0.03	2.10	0.11
1985-2004	4920	-0.04	0	2.07	0.11
1985-2004	4940	0	0	2.07	0.11
1985-2004	4960	0.03	0	2.06	0.11
1985-2004	4980	-0.9	-0.05	2.06	0.11
1985-2004	5020	0.22	0.01	2.04	0.11
1985-2004	5040	-1.83	-0.1	2.02	0.11
1985-2004	5060	0.86	0.04	2.02	0.11
1985-2004	5080	-0.46	-0.02	2.02	0.11
1985-2004	5160	-0.18	-0.01	1.97	0.10
1985-2004	5180	0	0	1.96	0.10
1985-2004	5200	-1.61	-0.08	1.95	0.10
1985-2004	5220	-2.44	-0.13	1.96	0.10
1985-2004	5240	-6.62	-0.34	1.94	0.10
1985-2004	5260	-7.34	-0.38	1.94	0.10
1985-2004	5280	-3.25	-0.17	1.93	0.10
1985-2004	5300	-0.47	-0.02	1.91	0.10
1985-2004	5320	1.8	0.09	1.91	0.10
1985-2004	5340	-0.43	-0.02	1.90	0.10
1985-2004	5360	0	0	1.89	0.10
1985-2004	5380	0	0	1.88	0.10
1985-2004	5400	0.83	0.04	1.87	0.10
1985-2004	6020	0.49	0.03	1.70	0.09
1985-2004	6040	-0.19	-0.01	1.69	0.09
1985-2004	6060	-1.88	-0.1	1.69	0.09
1985-2004	6080	0	0	1.69	0.09
1985-2004	6100	1.29	0.07	1.69	0.09
1985-2004	6120	-1.74	-0.09	1.69	0.09
1985-2004	6140	-2.23	-0.12	1.71	0.09
1985-2004	6160	-0.02	0	1.71	0.09
1985-2004	6300	1.02	0.05	1.74	0.09
1985-2004	6320	0.99	0.05	1.74	0.09
1985-2004	6420	-1	-0.05	1.77	0.09
1985-2004	6500	-0.55	-0.03	1.79	0.09
1985-2004	6520	-0.43	-0.02	1.79	0.09
1985-2004	6540	0.14	0.01	1.78	0.09
1985-2004	6620	1.7	0.09	1.80	0.09
1985-2004	6640	1.17	0.06	1.81	0.10
1985-2004	6660	1.29	0.07	1.81	0.10
1985-2004	6680	-5.28	-0.27	1.78	0.09
1985-2004	6900	-0.34	-0.02	1.72	0.09
1985-2004	6920	-2.26	-0.12	1.72	0.09
1985-2004	7000	-0.04	0	1.70	0.09
1985-2004	7020	-0.93	-0.05	1.70	0.09
1985-2004	7040	-0.19	-0.01	1.70	0.09
1985-2004	7060	-1.02	-0.05	1.67	0.09
1985-2004	7120	0	0	1.67	0.09
1985-2004	7140	-1.76	-0.09	1.66	0.09
1985-2004	7160	-1.45	-0.08	1.67	0.09
1985-2004	7200	-5.68	-0.3	1.67	0.09
1985-2004	7220	-5.7	-0.3	1.65	0.09
1985-2004	7340	-2.6	-0.14	1.66	0.09
1985-2004	7360	-0.21	-0.01	1.66	0.09
1985-2004	7380	-0.01	0	1.70	0.09
1985-2004	7540	-14.16	-0.74	1.77	0.09
1985-2004	7560	-5.33	-0.28	1.82	0.10
1985-2004	7620	0.99	0.05	1.82	0.10
1985-2004	7760	0.73	0.04	1.94	0.10
1985-2004	7780	-4.02	-0.21	1.94	0.10
1985-2004	7800	1.22	0.06	1.98	0.10
1985-2004	7820	-0.61	-0.03	1.98	0.10
1985-2004	7840	-3.5	-0.18	1.98	0.10
1985-2004	8000	-1.29	-0.07	1.99	0.10
1985-2004	8020	0	0	1.99	0.10
1985-2004	8040	0	0	1.99	0.10
1985-2004	8060	-5.22	-0.27	1.99	0.10
1985-2004	8080	-9.69	-0.5	1.99	0.10
1985-2004	8100	-2.61	-0.14	1.99	0.10
1985-2004	8120	-8.18	-0.43	1.99	0.10
2004-2015	500	-1.2	-0.11	1.56	0.14
2004-2015	640	-1.63	-0.15	1.57	0.14
2004-2015	660	-0.61	-0.06	1.57	0.14
2004-2015	820	-1.21	-0.11	1.60	0.15
2004-2015	960	-3.12	-0.29	1.62	0.15
2004-2015	1080	-0.54	-0.05	1.63	0.15
2004-2015	1220	-1.22	-0.11	1.63	0.15
2004-2015	1760	-0.59	-0.06	1.68	0.15
2004-2015	1800	0.81	0.08	1.69	0.15
2004-2015	1820	0.74	0.07	1.69	0.15
2004-2015	1840	0.18	0.02	1.70	0.15
2004-2015	2080	-0.87	-0.08	1.77	0.16
2004-2015	2200	-0.46	-0.04	1.80	0.16
2004-2015	2360	-0.12	-0.01	1.80	0.16
2004-2015	2380	-0.22	-0.02	1.78	0.16
2004-2015	2400	0	0	1.78	0.16
2004-2015	2420	-0.24	-0.02	1.78	0.16
2004-2015	2440	0.6	0.06	1.78	0.16
2004-2015	2460	-1.05	-0.1	1.77	0.16
2004-2015	2480	0.32	0.03	1.77	0.16
2004-2015	2500	-0.93	-0.09	1.77	0.16
2004-2015	2520	-0.48	-0.04	1.76	0.16
2004-2015	2560	-0.65	-0.06	1.74	0.16
2004-2015	2640	-0.35	-0.03	1.70	0.15
2004-2015	2660	0.95	0.09	1.68	0.15
2004-2015	2680	-1.85	-0.17	1.68	0.15
2004-2015	2700	1.02	0.09	1.66	0.15
2004-2015	2720	-1.26	-0.12	1.66	0.15
2004-2015	2740	0.5	0.05	1.66	0.15
2004-2015	2760	-15.47	-1.44	1.66	0.15
2004-2015	2900	-3.37	-0.31	1.56	0.14
2004-2015	2920	0.47	0.04	1.55	0.14
2004-2015	2980	-3.85	-0.36	1.51	0.14
2004-2015	3000	-1.68	-0.16	1.51	0.14
2004-2015	3020	1.38	0.13	1.47	0.13
2004-2015	3040	-0.27	-0.03	1.45	0.13
2004-2015	3060	-1.15	-0.11	1.45	0.13
2004-2015	3080	-1.63	-0.15	1.42	0.13
2004-2015	3100	-1.58	-0.15	1.42	0.13
2004-2015	3120	-0.5	-0.05	1.42	0.13
2004-2015	3140	-2.53	-0.24	1.42	0.13
2004-2015	3160	-0.76	-0.07	1.47	0.13
2004-2015	3180	-0.48	-0.04	1.52	0.14
2004-2015	3200	-2.09	-0.19	1.52	0.14
2004-2015	3220	0.07	0.01	1.61	0.15
2004-2015	3240	0.45	0.04	1.72	0.16
2004-2015	3260	-0.98	-0.09	1.72	0.16
2004-2015	3280	-1.82	-0.17	1.79	0.16
2004-2015	3300	0	0	1.80	0.16
2004-2015	3320	0.16	0.01	1.79	0.16
2004-2015	3520	-0.39	-0.04	1.72	0.16
2004-2015	3660	-16.42	-1.53	1.69	0.15
2004-2015	3680	-13.97	-1.3	1.68	0.15
2004-2015	3700	-14.21	-1.32	1.68	0.15
2004-2015	3800	-0.43	-0.04	1.67	0.15
2004-2015	3840	0.37	0.03	1.67	0.15
2004-2015	3880	-1.16	-0.11	1.66	0.15
2004-2015	3900	-0.1	-0.01	1.66	0.15
2004-2015	3920	-0.89	-0.08	1.66	0.15
2004-2015	3960	1.11	0.1	1.66	0.15
2004-2015	4100	-0.17	-0.02	1.66	0.15
2004-2015	4120	1.05	0.1	1.67	0.15
2004-2015	4160	0.07	0.01	1.67	0.15
2004-2015	4180	1.12	0.1	1.67	0.15
2004-2015	4200	1.14	0.11	1.68	0.15
2004-2015	4260	1.52	0.14	1.69	0.15
2004-2015	4400	1.22	0.11	1.74	0.16
2004-2015	4420	1.14	0.11	1.75	0.16
2004-2015	4700	-1.37	-0.13	1.87	0.17
2004-2015	4720	0.71	0.07	1.88	0.17
2004-2015	4740	1.39	0.13	1.88	0.17
2004-2015	4760	-0.35	-0.03	1.90	0.17
2004-2015	4780	-0.44	-0.04	1.91	0.17
2004-2015	4800	-0.22	-0.02	1.91	0.17
2004-2015	4840	0.09	0.01	1.93	0.18
2004-2015	4860	0	0	1.93	0.18
2004-2015	4880	0	0	1.91	0.17
2004-2015	4900	0.49	0.05	1.93	0.18
2004-2015	4920	0.29	0.03	1.91	0.17
2004-2015	4940	1.15	0.11	1.91	0.17
2004-2015	4960	1.66	0.15	1.89	0.17
2004-2015	5000	-0.16	-0.02	1.87	0.17
2004-2015	5080	0.57	0.05	1.84	0.17
2004-2015	5180	0.67	0.06	1.79	0.16
2004-2015	5240	-0.8	-0.07	1.76	0.16
2004-2015	5340	1.53	0.14	1.74	0.16
2004-2015	5380	-0.68	-0.06	1.72	0.16
2004-2015	5460	0.04	0	1.72	0.16
2004-2015	5480	-0.03	0	1.71	0.16
2004-2015	5660	-1.22	-0.11	1.68	0.15
2004-2015	5760	0	0	1.69	0.15
2004-2015	5900	1.18	0.11	1.69	0.15
2004-2015	5940	0	0	1.69	0.15
2004-2015	5980	-0.92	-0.09	1.69	0.15
2004-2015	6020	0.91	0.08	1.70	0.15
2004-2015	6060	1.26	0.12	1.71	0.16
2004-2015	6080	0.47	0.04	1.71	0.16
2004-2015	6100	-1.29	-0.12	1.70	0.15
2004-2015	6160	1.02	0.1	1.73	0.16
2004-2015	6260	-0.37	-0.03	1.75	0.16
2004-2015	6280	-0.9	-0.08	1.77	0.16
2004-2015	6300	-0.7	-0.07	1.77	0.16
2004-2015	6320	-0.6	-0.06	1.79	0.16
2004-2015	6420	-3.94	-0.37	1.83	0.17
2004-2015	6500	-0.65	-0.06	1.90	0.17
2004-2015	6520	0.71	0.07	1.89	0.17
2004-2015	6620	0.87	0.08	1.89	0.17
2004-2015	6640	0.74	0.07	1.90	0.17
2004-2015	6660	0	0	1.90	0.17
2004-2015	6680	-1.96	-0.18	1.90	0.17
2004-2015	6780	0.72	0.07	1.87	0.17
2004-2015	6800	1.4	0.13	1.87	0.17
2004-2015	6820	1.13	0.11	1.84	0.17
2004-2015	6840	1.41	0.13	1.83	0.17
2004-2015	6860	0.94	0.09	1.83	0.17
2004-2015	6880	0.91	0.08	1.83	0.17
2004-2015	6900	-1.49	-0.14	1.82	0.17
2004-2015	6940	-3.1	-0.29	1.82	0.17
2004-2015	6960	1.68	0.16	1.81	0.16
2004-2015	6980	1.69	0.16	1.81	0.16
2004-2015	7000	-2.88	-0.27	1.81	0.16
2004-2015	7040	1.22	0.11	1.79	0.16
2004-2015	7060	-0.03	0	1.79	0.16
2004-2015	7120	-0.45	-0.04	1.79	0.16
2004-2015	7140	-0.79	-0.07	1.79	0.16
2004-2015	7160	0.56	0.05	1.79	0.16
2004-2015	7200	1.4	0.13	1.80	0.16
2004-2015	7220	1.08	0.1	1.78	0.16
2004-2015	7340	-0.22	-0.02	1.78	0.16
2004-2015	7360	0.26	0.02	1.78	0.16
2004-2015	7380	-0.38	-0.04	1.77	0.16
2004-2015	7540	-0.55	-0.05	1.68	0.15
2004-2015	7560	-0.41	-0.04	1.68	0.15
2004-2015	7620	-0.84	-0.08	1.64	0.15
2004-2015	7760	-1.67	-0.16	1.56	0.14
2004-2015	7780	-0.3	-0.03	1.53	0.14
2004-2015	7800	-0.16	-0.01	1.53	0.14
2004-2015	7820	0.77	0.07	1.54	0.14
2004-2015	7840	-2.09	-0.19	1.51	0.14
2004-2015	8000	-0.82	-0.08	1.50	0.14
2004-2015	8020	-1.49	-0.14	1.50	0.14
2004-2015	8040	-0.52	-0.05	1.50	0.14
2004-2015	8060	-0.9	-0.08	1.50	0.14
2004-2015	8080	-2.39	-0.22	1.50	0.14
2004-2015	8100	-1.11	-0.1	1.50	0.14
2004-2015	8120	-1.46	-0.14	1.50	0.14
2004-2015	8140	-1.28	-0.12	1.51	0.14
2004-2015	8200	-16.63	-1.55	1.51	0.14
2004-2015	8220	-19.18	-1.79	1.52	0.14
2004-2015	8240	-2.21	-0.21	1.52	0.14
2004-2015	8260	-0.65	-0.06	1.53	0.14
2004-2015	8280	-0.62	-0.06	1.54	0.14
2004-2015	8300	-0.65	-0.06	1.54	0.14
2004-2015	8320	-0.51	-0.05	1.54	0.14
2015-2017	500	-3.16	-1.58	1.17	0.58
2015-2017	640	-0.36	-0.18	1.19	0.59
2015-2017	660	-0.06	-0.03	1.19	0.59
2015-2017	820	-0.35	-0.17	1.21	0.61
2015-2017	980	-0.35	-0.18	1.23	0.62
2015-2017	1080	0	0	1.25	0.62
2015-2017	1220	0	0	1.26	0.63
2015-2017	1760	-1.41	-0.7	1.28	0.64
2015-2017	1780	-4.9	-2.45	1.28	0.64
2015-2017	1800	-3.17	-1.59	1.28	0.64
2015-2017	1820	-4.02	-2.01	1.28	0.64
2015-2017	1840	-2.6	-1.3	1.28	0.64
2015-2017	1860	-10.13	-5.06	1.28	0.64
2015-2017	1880	-5.45	-2.73	1.28	0.64
2015-2017	1900	-1.73	-0.86	1.29	0.65
2015-2017	2080	0	0	1.34	0.67
2015-2017	2200	-2.31	-1.15	1.35	0.68
2015-2017	2360	-3.92	-1.96	1.34	0.67
2015-2017	2380	-9.1	-4.55	1.31	0.65
2015-2017	2400	0	0	1.30	0.65
2015-2017	2420	-1.48	-0.74	1.30	0.65
2015-2017	2440	-1.05	-0.53	1.30	0.65
2015-2017	2460	-0.42	-0.21	1.29	0.64
2015-2017	2480	-3.31	-1.65	1.29	0.64
2015-2017	2500	-1.04	-0.52	1.29	0.64
2015-2017	2520	-2.27	-1.14	1.27	0.64
2015-2017	2540	-10.02	-5.01	1.24	0.62
2015-2017	2560	-1.49	-0.75	1.24	0.62
2015-2017	2580	0	0	1.24	0.62
2015-2017	2620	0	0	1.22	0.61
2015-2017	2640	-4.9	-2.45	1.19	0.59
2015-2017	2660	-6.08	-3.04	1.16	0.58
2015-2017	2680	-3.42	-1.71	1.16	0.58
2015-2017	2700	-9.17	-4.59	1.14	0.57
2015-2017	2720	-4.51	-2.25	1.14	0.57
2015-2017	2740	-10.57	-5.28	1.14	0.57
2015-2017	2760	-0.98	-0.49	1.14	0.57
2015-2017	2780	-6.49	-3.24	1.11	0.55
2015-2017	2800	-3.56	-1.78	1.09	0.54
2015-2017	2860	-12.94	-6.47	1.07	0.53
2015-2017	2900	-4.39	-2.19	1.04	0.52
2015-2017	2920	-3.91	-1.95	1.04	0.52
2015-2017	2980	-0.97	-0.49	1.01	0.51
2015-2017	3000	-6.35	-3.17	1.01	0.50
2015-2017	3020	-2.14	-1.07	0.99	0.49
2015-2017	3040	0	0	0.99	0.49
2015-2017	3060	-1.2	-0.6	0.99	0.49
2015-2017	3080	-0.56	-0.28	0.97	0.49
2015-2017	3100	0	0	0.97	0.49
2015-2017	3120	-2.47	-1.23	0.97	0.49
2015-2017	3140	-1.24	-0.62	0.97	0.49
2015-2017	3160	-1.85	-0.93	0.96	0.48
2015-2017	3180	-1.76	-0.88	0.96	0.48
2015-2017	3200	-0.98	-0.49	0.96	0.48
2015-2017	3220	-3	-1.5	0.95	0.48
2015-2017	3240	-2.45	-1.23	0.95	0.48
2015-2017	3260	-2.84	-1.42	0.95	0.48
2015-2017	3280	0	0	0.95	0.47
2015-2017	3300	-0.57	-0.29	0.95	0.48
2015-2017	3320	-0.97	-0.48	0.95	0.48
2015-2017	3340	-4.59	-2.29	0.96	0.48
2015-2017	3520	-3.17	-1.59	0.97	0.48
2015-2017	3560	-9.02	-4.51	0.98	0.49
2015-2017	3660	-0.31	-0.15	0.98	0.49
2015-2017	3680	-0.29	-0.15	0.98	0.49
2015-2017	3700	-1.92	-0.96	0.98	0.49
2015-2017	3740	-10.78	-5.39	0.98	0.49
2015-2017	3760	-16.25	-8.13	0.98	0.49
2015-2017	3780	-4.76	-2.38	0.99	0.49
2015-2017	3800	-6.43	-3.22	0.99	0.49
2015-2017	3840	-1.21	-0.61	0.98	0.49
2015-2017	3880	-0.29	-0.15	0.98	0.49
2015-2017	3900	0.18	0.09	0.98	0.49
2015-2017	3920	-1.49	-0.74	0.98	0.49
2015-2017	3940	-1.84	-0.92	0.98	0.49
2015-2017	3960	-1.87	-0.94	0.98	0.49
2015-2017	3980	-4.92	-2.46	0.98	0.49
2015-2017	4020	-1.5	-0.75	0.98	0.49
2015-2017	4040	-3.17	-1.59	0.98	0.49
2015-2017	4060	-3.56	-1.78	0.98	0.49
2015-2017	4080	-4.07	-2.04	0.98	0.49
2015-2017	4100	-3.82	-1.91	0.98	0.49
2015-2017	4120	-4.15	-2.08	0.98	0.49
2015-2017	4140	-6.22	-3.11	0.98	0.49
2015-2017	4160	-4.23	-2.12	0.98	0.49
2015-2017	4180	-3.82	-1.91	0.98	0.49
2015-2017	4200	-3	-1.5	0.99	0.49
2015-2017	4220	-2.56	-1.28	1.00	0.50
2015-2017	4240	-3.16	-1.58	1.00	0.50
2015-2017	4260	-2.67	-1.33	1.00	0.50
2015-2017	4280	-4.1	-2.05	1.00	0.50
2015-2017	4700	-1.12	-0.56	1.08	0.54
2015-2017	4720	-14.8	-7.4	1.08	0.54
2015-2017	4740	-18.75	-9.38	1.08	0.54
2015-2017	4760	-7.01	-3.51	1.08	0.54
2015-2017	4780	-0.19	-0.09	1.08	0.54
2015-2017	4800	0	0	1.09	0.54
2015-2017	4840	-0.09	-0.04	1.09	0.54
2015-2017	4860	-0.14	-0.07	1.09	0.55
2015-2017	4880	0	0	1.09	0.55
2015-2017	4900	-0.57	-0.28	1.09	0.55
2015-2017	4920	-0.83	-0.42	1.10	0.55
2015-2017	4940	-2.15	-1.08	1.10	0.55
2015-2017	4960	-3.85	-1.92	1.10	0.55
2015-2017	4980	-3.71	-1.86	1.10	0.55
2015-2017	5000	-11.92	-5.96	1.10	0.55
2015-2017	5020	-12.27	-6.14	1.10	0.55
2015-2017	5040	-11.15	-5.57	1.11	0.55
2015-2017	5060	-12.48	-6.24	1.11	0.56
2015-2017	5080	-4.44	-2.22	1.11	0.56
2015-2017	5160	-8.47	-4.24	1.13	0.56
2015-2017	5180	-2.87	-1.44	1.13	0.56
2015-2017	5200	-2.97	-1.49	1.14	0.57
2015-2017	5220	-2.65	-1.33	1.14	0.57
2015-2017	5240	-1.6	-0.8	1.14	0.57
2015-2017	5260	-3.46	-1.73	1.15	0.57
2015-2017	5280	-5.33	-2.67	1.15	0.57
2015-2017	5300	-5.95	-2.98	1.15	0.58
2015-2017	5320	-5.64	-2.82	1.17	0.58
2015-2017	5340	-6.14	-3.07	1.17	0.58
2015-2017	5360	-5.71	-2.86	1.17	0.58
2015-2017	5380	-3.06	-1.53	1.17	0.58
2015-2017	5400	-9.14	-4.57	1.18	0.59
2015-2017	5460	-1.08	-0.54	1.21	0.60
2015-2017	5480	0	0	1.21	0.60
2015-2017	5500	-4.48	-2.24	1.22	0.61
2015-2017	5660	-2.27	-1.14	1.27	0.63
2015-2017	5760	-4.9	-2.45	1.31	0.66
2015-2017	5820	0	0	1.31	0.66
2015-2017	5900	-5.18	-2.59	1.36	0.68
2015-2017	5920	-0.92	-0.46	1.36	0.68
2015-2017	5940	-0.9	-0.45	1.36	0.68
2015-2017	5960	-3.31	-1.65	1.38	0.69
2015-2017	5980	-9.42	-4.71	1.38	0.69
2015-2017	6020	-6.85	-3.43	1.40	0.70
2015-2017	6040	-6.97	-3.49	1.40	0.70
2015-2017	6060	-3.94	-1.97	1.42	0.71
2015-2017	6080	-7.28	-3.64	1.42	0.71
2015-2017	6100	0	0	1.42	0.71
2015-2017	6120	-2.06	-1.03	1.44	0.72
2015-2017	6140	-11.06	-5.53	1.45	0.72
2015-2017	6160	-1.37	-0.69	1.45	0.72
2015-2017	6200	-1.33	-0.66	1.45	0.72
2015-2017	6260	-0.97	-0.49	1.47	0.74
2015-2017	6280	-2.22	-1.11	1.50	0.75
2015-2017	6300	-1.04	-0.52	1.50	0.75
2015-2017	6320	-0.45	-0.22	1.54	0.77
2015-2017	6420	-8.09	-4.04	1.57	0.79
2015-2017	6440	-3.28	-1.64	1.57	0.78
2015-2017	6460	-0.99	-0.5	1.60	0.80
2015-2017	6480	-0.89	-0.44	1.60	0.80
2015-2017	6500	-0.88	-0.44	1.66	0.83
2015-2017	6520	-1.45	-0.73	1.63	0.82
2015-2017	6540	-12.11	-6.06	1.61	0.80
2015-2017	6620	-8.72	-4.36	1.63	0.81
2015-2017	6640	-3.63	-1.82	1.64	0.82
2015-2017	6660	-2.99	-1.49	1.64	0.82
2015-2017	6680	0	0	1.64	0.82
2015-2017	6700	-1.7	-0.85	1.60	0.80
2015-2017	6780	-2.11	-1.06	1.58	0.79
2015-2017	6800	-1.26	-0.63	1.58	0.79
2015-2017	6820	0	0	1.55	0.78
2015-2017	6840	0	0	1.54	0.77
2015-2017	6860	-5.94	-2.97	1.54	0.77
2015-2017	6880	0	0	1.54	0.77
2015-2017	6900	-10.61	-5.3	1.52	0.76
2015-2017	6920	-6.13	-3.06	1.52	0.76
2015-2017	6940	-5.74	-2.87	1.52	0.76
2015-2017	6960	-8.99	-4.5	1.50	0.75
2015-2017	6980	-4.08	-2.04	1.50	0.75
2015-2017	7000	-6.28	-3.14	1.50	0.75
2015-2017	7020	-9.1	-4.55	1.48	0.74
2015-2017	7040	-8.98	-4.49	1.47	0.74
2015-2017	7060	-9.73	-4.87	1.47	0.74
2015-2017	7120	-4.53	-2.26	1.47	0.73
2015-2017	7140	-4.78	-2.39	1.46	0.73
2015-2017	7160	0.14	0.07	1.46	0.73
2015-2017	7200	-3.59	-1.8	1.46	0.73
2015-2017	7220	-5.3	-2.65	1.45	0.72
2015-2017	7240	-2.34	-1.17	1.45	0.72
2015-2017	7260	-4.01	-2	1.45	0.72
2015-2017	7280	0	0	1.44	0.72
2015-2017	7340	0	0	1.44	0.72
2015-2017	7360	-0.89	-0.44	1.44	0.72
2015-2017	7380	-3.02	-1.51	1.42	0.71
2015-2017	7520	-14.57	-7.28	1.34	0.67
2015-2017	7540	-19.07	-9.53	1.29	0.65
2015-2017	7560	-13.89	-6.94	1.29	0.65
2015-2017	7580	-9.45	-4.72	1.24	0.62
2015-2017	7620	-17.87	-8.94	1.24	0.62
2015-2017	7640	-9.47	-4.73	1.23	0.61
2015-2017	7660	-2.81	-1.4	1.18	0.59
2015-2017	7680	0	0	1.18	0.59
2015-2017	7700	-1.38	-0.69	1.18	0.59
2015-2017	7740	-5	-2.5	1.12	0.56
2015-2017	7760	-18.31	-9.16	1.12	0.56
2015-2017	7780	-1.6	-0.8	1.08	0.54
2015-2017	7800	-1.83	-0.91	1.08	0.54
2015-2017	7820	-5.84	-2.92	1.09	0.54
2015-2017	7840	-1.56	-0.78	1.06	0.53
2015-2017	7860	-11.85	-5.92	1.06	0.53
2015-2017	7880	-4.83	-2.41	1.06	0.53
2015-2017	7900	-5.3	-2.65	1.03	0.52
2015-2017	7920	-6.94	-3.47	1.03	0.52
2015-2017	7940	-0.04	-0.02	1.05	0.53
2015-2017	8000	-0.37	-0.19	1.04	0.52
2015-2017	8020	-4.81	-2.41	1.04	0.52
2015-2017	8040	0	0	1.03	0.52
2015-2017	8060	0	0	1.03	0.52
2015-2017	8080	0	0	1.03	0.52
2015-2017	8100	-15.85	-7.92	1.03	0.52
2015-2017	8120	-0.77	-0.39	1.03	0.52
2015-2017	8140	-8.98	-4.49	1.05	0.53
2015-2017	8200	-4.89	-2.45	1.06	0.53
2015-2017	8220	-0.16	-0.08	1.06	0.53
2015-2017	8240	0	0	1.06	0.53
2015-2017	8260	-0.23	-0.11	1.08	0.54
2015-2017	8280	0	0	1.09	0.54
2015-2017	8300	0	0	1.09	0.54
2015-2017	8320	-2.44	-1.22	1.09	0.54
2017-2022	640	0.65	0.13	1.40	0.28
2017-2022	660	-0.1	-0.02	1.40	0.28
2017-2022	960	-0.75	-0.15	1.19	0.24
2017-2022	980	0.14	0.03	1.19	0.24
2017-2022	1080	0.04	0.01	1.12	0.22
2017-2022	1220	-7.39	-1.46	1.28	0.26
2017-2022	1240	-2.92	-0.58	1.28	0.26
2017-2022	1260	0.86	0.17	1.50	0.30
2017-2022	1280	-2.35	-0.46	1.52	0.30
2017-2022	1300	-0.77	-0.15	1.45	0.29
2017-2022	1320	-4.04	-0.8	1.42	0.28
2017-2022	1560	0.16	0.03	1.20	0.24
2017-2022	1580	0	0	1.20	0.24
2017-2022	1640	-0.02	0	1.27	0.25
2017-2022	1660	0.15	0.03	1.28	0.26
2017-2022	1680	0.31	0.06	1.29	0.26
2017-2022	1700	0.63	0.12	1.29	0.26
2017-2022	1760	-0.04	-0.01	1.22	0.24
2017-2022	1780	-0.07	-0.01	1.16	0.23
2017-2022	1800	-0.24	-0.05	1.10	0.22
2017-2022	1820	-0.02	0	1.07	0.21
2017-2022	1840	-0.25	-0.05	1.07	0.21
2017-2022	1860	-1.04	-0.21	1.07	0.21
2017-2022	1880	-0.32	-0.06	1.10	0.22
2017-2022	1900	-0.04	-0.01	1.12	0.22
2017-2022	2080	-0.04	-0.01	1.19	0.24
2017-2022	2100	0.26	0.05	1.20	0.24
2017-2022	2120	0	0	1.20	0.24
2017-2022	2140	0.94	0.19	1.20	0.24
2017-2022	2200	0.27	0.05	1.19	0.24
2017-2022	2220	0.05	0.01	1.19	0.24
2017-2022	2240	0.39	0.08	1.20	0.24
2017-2022	2260	0.56	0.11	1.20	0.24
2017-2022	2280	-0.1	-0.02	1.20	0.24
2017-2022	2360	-2.29	-0.45	1.21	0.24
2017-2022	2380	0.03	0.01	1.22	0.24
2017-2022	2400	-2.06	-0.41	1.23	0.25
2017-2022	2420	-2.06	-0.41	1.23	0.25
2017-2022	2440	-1.8	-0.36	1.24	0.25
2017-2022	2460	-0.07	-0.01	1.25	0.25
2017-2022	2480	-1.5	-0.3	1.26	0.25
2017-2022	2500	-0.42	-0.08	1.29	0.26
2017-2022	2520	0.09	0.02	1.30	0.26
2017-2022	2540	0.17	0.03	1.31	0.26
2017-2022	2560	-8.61	-1.7	1.32	0.26
2017-2022	2580	0	0	1.34	0.27
2017-2022	2620	-0.08	-0.02	1.38	0.28
2017-2022	2640	-0.32	-0.06	1.40	0.28
2017-2022	2660	-0.18	-0.04	1.40	0.28
2017-2022	2680	-0.19	-0.04	1.42	0.28
2017-2022	2700	-4.88	-0.97	1.44	0.29
2017-2022	2720	0	0	1.47	0.29
2017-2022	2740	0.11	0.02	1.50	0.30
2017-2022	2760	-0.05	-0.01	1.50	0.30
2017-2022	2780	0	0	1.54	0.31
2017-2022	2800	0.38	0.08	1.54	0.31
2017-2022	2840	-0.08	-0.02	1.60	0.32
2017-2022	2860	0.25	0.05	1.63	0.33
2017-2022	2900	0.32	0.06	1.70	0.34
2017-2022	2920	0.28	0.06	1.73	0.35
2017-2022	2980	0	0	1.73	0.35
2017-2022	3000	-0.81	-0.16	1.71	0.34
2017-2022	3020	0.2	0.04	1.67	0.33
2017-2022	3040	0.26	0.05	1.67	0.33
2017-2022	3060	0.53	0.1	1.60	0.32
2017-2022	3080	0.64	0.13	1.48	0.30
2017-2022	3100	-0.25	-0.05	1.40	0.28
2017-2022	3120	0.75	0.15	1.36	0.27
2017-2022	3140	0.18	0.04	1.29	0.26
2017-2022	3160	0.67	0.13	1.21	0.24
2017-2022	3180	0.56	0.11	1.16	0.23
2017-2022	3200	0.92	0.18	1.15	0.23
2017-2022	3220	-1.88	-0.37	1.10	0.22
2017-2022	3240	0.59	0.12	1.07	0.21
2017-2022	3260	0.52	0.1	1.04	0.21
2017-2022	3280	0.37	0.07	1.03	0.21
2017-2022	3300	0.67	0.13	1.03	0.21
2017-2022	3320	0.92	0.18	1.07	0.21
2017-2022	3340	-0.59	-0.12	1.09	0.22
2017-2022	3360	0	0	1.10	0.22
2017-2022	3380	0.49	0.1	1.14	0.23
2017-2022	3400	0.31	0.06	1.17	0.23
2017-2022	3520	-1.47	-0.29	1.37	0.27
2017-2022	3560	-0.23	-0.04	1.39	0.28
2017-2022	3660	0.43	0.09	1.45	0.29
2017-2022	3680	0	0	1.47	0.29
2017-2022	3700	1.01	0.2	1.51	0.30
2017-2022	3740	0.8	0.16	1.56	0.31
2017-2022	3840	0.95	0.19	1.81	0.36
2017-2022	3880	0.4	0.08	1.64	0.33
2017-2022	3900	0.39	0.08	1.58	0.32
2017-2022	3920	0.84	0.17	1.58	0.32
2017-2022	3940	0.86	0.17	1.47	0.29
2017-2022	3960	0.63	0.12	1.54	0.31
2017-2022	3980	1.04	0.21	1.72	0.34
2017-2022	4020	-0.01	0	2.07	0.41
2017-2022	4040	1.4	0.28	2.07	0.41
2017-2022	4060	1.83	0.36	2.08	0.42
2017-2022	4080	1.77	0.35	2.09	0.42
2017-2022	4100	0.67	0.13	2.11	0.42
2017-2022	4120	0.93	0.18	2.29	0.46
2017-2022	4140	1.4	0.28	2.14	0.43
2017-2022	4200	1.55	0.31	1.69	0.34
2017-2022	4220	1.23	0.24	1.81	0.36
2017-2022	4240	1.65	0.33	1.86	0.37
2017-2022	4260	-0.02	0	1.88	0.38
2017-2022	4280	-0.25	-0.05	1.90	0.38
2017-2022	4720	-1.45	-0.29	2.11	0.42
2017-2022	4740	0	0	2.15	0.43
2017-2022	4760	0.54	0.11	2.17	0.43
2017-2022	4780	0.99	0.2	2.23	0.45
2017-2022	4800	0.77	0.15	2.23	0.45
2017-2022	4840	0.75	0.15	2.34	0.47
2017-2022	4860	0.21	0.04	2.40	0.48
2017-2022	4880	0.22	0.04	2.52	0.50
2017-2022	4900	-0.14	-0.03	2.51	0.50
2017-2022	4920	0.57	0.11	2.67	0.53
2017-2022	4940	1.12	0.22	2.67	0.53
2017-2022	4960	1.87	0.37	2.90	0.58
2017-2022	4980	2.55	0.5	2.68	0.54
2017-2022	5020	0.89	0.18	1.37	0.27
2017-2022	5160	0.38	0.08	1.76	0.35
2017-2022	5180	1.23	0.24	1.76	0.35
2017-2022	5200	1.58	0.31	1.75	0.35
2017-2022	5220	1.48	0.29	1.74	0.35
2017-2022	5240	0.31	0.06	1.73	0.35
2017-2022	5260	1.38	0.27	1.73	0.35
2017-2022	5280	0.86	0.17	1.74	0.35
2017-2022	5300	1.46	0.29	1.74	0.35
2017-2022	5320	0.2	0.04	1.75	0.35
2017-2022	5340	1.44	0.28	1.76	0.35
2017-2022	5360	0.86	0.17	1.77	0.35
2017-2022	5380	-0.01	0	1.77	0.35
2017-2022	5460	0.77	0.15	1.80	0.36
2017-2022	5480	0.44	0.09	1.81	0.36
2017-2022	5500	1.59	0.32	1.82	0.36
2017-2022	5660	-3.91	-0.77	1.84	0.37
2017-2022	5760	-5.51	-1.09	1.85	0.37
2017-2022	5820	-1.62	-0.32	1.85	0.37
2017-2022	5900	-1.72	-0.34	1.85	0.37
2017-2022	5920	-0.13	-0.03	1.85	0.37
2017-2022	5940	0.95	0.19	1.85	0.37
2017-2022	6020	-1.27	-0.25	1.85	0.37
2017-2022	6040	-1.04	-0.2	1.85	0.37
2017-2022	6060	-1.13	-0.22	1.85	0.37
2017-2022	6080	-1.01	-0.2	1.85	0.37
2017-2022	6100	0.21	0.04	1.85	0.37
2017-2022	6120	-0.08	-0.02	1.84	0.37
2017-2022	6140	-0.96	-0.19	1.84	0.37
2017-2022	6160	-3.92	-0.77	1.84	0.37
2017-2022	6200	-5.13	-1.02	1.84	0.37
2017-2022	6260	0.26	0.05	1.84	0.37
2017-2022	6280	-6.56	-1.3	1.84	0.37
2017-2022	6300	-1.28	-0.25	1.84	0.37
2017-2022	6320	-1.45	-0.29	1.84	0.37
2017-2022	6420	-1.52	-0.3	1.84	0.37
2017-2022	6440	-1.71	-0.34	1.84	0.37
2017-2022	6460	-4.8	-0.95	1.83	0.37
2017-2022	6480	-0.73	-0.15	1.83	0.37
2017-2022	6500	-0.53	-0.11	1.83	0.37
2017-2022	6520	-1.55	-0.31	1.83	0.37
2017-2022	6540	-1.77	-0.35	1.83	0.37
2017-2022	6620	-2.23	-0.44	1.83	0.37
2017-2022	6640	-0.67	-0.13	1.83	0.37
2017-2022	6660	-0.45	-0.09	1.83	0.37
2017-2022	6680	-2.82	-0.56	1.83	0.37
2017-2022	6700	-1.44	-0.28	1.83	0.37
2017-2022	6780	0	0	1.83	0.37
2017-2022	6800	-0.18	-0.03	1.82	0.36
2017-2022	6820	-0.63	-0.13	1.82	0.36
2017-2022	6840	-0.76	-0.15	1.82	0.36
2017-2022	6860	-1.81	-0.36	1.82	0.36
2017-2022	6880	-13.84	-2.74	1.82	0.36
2017-2022	6900	-0.84	-0.17	1.82	0.36
2017-2022	6920	-3.78	-0.75	1.82	0.36
2017-2022	6940	-1.91	-0.38	1.82	0.36
2017-2022	6960	-0.49	-0.1	1.82	0.36
2017-2022	6980	-1.18	-0.23	1.82	0.36
2017-2022	7000	-2.63	-0.52	1.82	0.36
2017-2022	7020	-2.55	-0.5	1.82	0.36
2017-2022	7040	-3.06	-0.61	1.82	0.36
2017-2022	7060	-2.81	-0.56	1.82	0.36
2017-2022	7120	-0.97	-0.19	1.82	0.36
2017-2022	7140	-2.16	-0.43	1.82	0.36
2017-2022	7160	-1.6	-0.32	1.82	0.36
2017-2022	7200	-3.19	-0.63	1.82	0.36
2017-2022	7220	-0.49	-0.1	1.81	0.36
2017-2022	7240	-0.29	-0.06	1.81	0.36
2017-2022	7260	-0.63	-0.13	1.81	0.36
2017-2022	7280	-1.66	-0.33	1.81	0.36
2017-2022	7340	-0.48	-0.09	1.81	0.36
2017-2022	7360	0.09	0.02	1.81	0.36
2017-2022	7380	-0.01	0	1.81	0.36
2017-2022	7520	-0.11	-0.02	1.81	0.36
2017-2022	7540	0.57	0.11	1.81	0.36
2017-2022	7560	-0.49	-0.1	1.81	0.36
2017-2022	7580	-1.59	-0.31	1.81	0.36
2017-2022	7620	0.4	0.08	1.81	0.36
2017-2022	7640	0	0	1.81	0.36
2017-2022	7660	0	0	1.81	0.36
2017-2022	7680	-1.42	-0.28	1.81	0.36
2017-2022	7700	0.12	0.02	1.81	0.36
2017-2022	7740	-1.22	-0.24	1.80	0.36
2017-2022	7760	-0.36	-0.07	1.80	0.36
2017-2022	7780	-0.02	0	1.80	0.36
2017-2022	7800	-0.34	-0.07	1.80	0.36
2017-2022	7820	-0.09	-0.02	1.80	0.36
2017-2022	7840	0.12	0.02	1.80	0.36
2017-2022	7860	0.07	0.01	1.80	0.36
2017-2022	7880	-0.02	0	1.80	0.36
2017-2022	7900	-0.19	-0.04	1.80	0.36
2017-2022	7920	-0.23	-0.05	1.80	0.36
2017-2022	7940	0.27	0.05	1.80	0.36
2017-2022	8000	0.93	0.18	1.80	0.36
2017-2022	8020	0.69	0.14	1.80	0.36
2017-2022	8040	-0.13	-0.03	1.80	0.36
2017-2022	8060	-0.49	-0.1	1.80	0.36
2017-2022	8080	-5.67	-1.12	1.80	0.36
2017-2022	8100	-0.14	-0.03	1.80	0.36
2017-2022	8120	-0.62	-0.12	1.80	0.36
2017-2022	8140	-0.16	-0.03	1.80	0.36
2017-2022	8200	0.06	0.01	1.80	0.36
2017-2022	8220	0.4	0.08	1.80	0.36
2017-2022	8240	0	0	1.80	0.36
2017-2022	8260	1.01	0.2	1.80	0.36
2017-2022	8280	0.12	0.02	1.80	0.36
2017-2022	8300	-0.9	-0.18	1.80	0.36
2017-2022	8320	-5.34	-1.06	1.80	0.36
1950-2022	4120	-7.82	-0.11	3.63	0.05
1950-2022	4140	-2.13	-0.03	3.54	0.05
1950-2022	4160	-3.9	-0.05	3.37	0.05
1950-2022	4180	0.58	0.01	3.29	0.05
1950-2022	4200	-0.85	-0.01	3.29	0.05
1950-2022	4220	-4.03	-0.06	3.33	0.05
1950-2022	4240	-3.89	-0.05	3.35	0.05
1950-2022	4260	-7.76	-0.11	3.36	0.05
1950-2022	4280	-11.41	-0.16	3.37	0.05
1950-2022	4300	-11.81	-0.17	3.37	0.05
1950-2022	4320	-14.83	-0.21	3.34	0.05
1950-2022	4340	-14.87	-0.21	3.34	0.05
1950-2022	4360	-7.57	-0.11	3.33	0.05
1950-2022	4380	-10.76	-0.15	3.34	0.05
1950-2022	4400	-11.67	-0.16	3.33	0.05
1950-2022	4420	-7.64	-0.11	3.32	0.05
1950-2022	4440	-14.32	-0.2	3.31	0.05
1950-2022	4720	-31.97	-0.45	3.24	0.04
1950-2022	4740	-32.28	-0.45	3.24	0.05
1950-2022	4760	-4.89	-0.07	3.29	0.05
1950-2022	4780	-2.37	-0.03	3.31	0.05
1950-2022	4800	-3.43	-0.05	3.31	0.05
1950-2022	4840	-2.89	-0.04	3.33	0.05
1950-2022	4860	-1.4	-0.02	3.38	0.05
1950-2022	4880	-1.47	-0.02	3.45	0.05
1950-2022	4900	-2.24	-0.03	3.41	0.05
1950-2022	4920	-1.06	-0.01	3.52	0.05
1950-2022	4940	-1.37	-0.02	3.52	0.05
1950-2022	4960	-3.28	-0.05	3.69	0.05
1950-2022	4980	-1.32	-0.02	3.49	0.05
1950-2022	5000	-24.13	-0.34	3.55	0.05
1950-2022	5020	-17.44	-0.24	2.59	0.04
1950-2022	5040	-19.83	-0.28	2.56	0.04
1950-2022	5060	-21.55	-0.3	2.53	0.04
1950-2022	5080	-18.8	-0.26	2.59	0.04
1950-2022	5160	-11.07	-0.16	2.68	0.04
1950-2022	5180	-21.64	-0.3	2.68	0.04
1950-2022	5200	-21.25	-0.3	2.68	0.04
1950-2022	5220	-24.67	-0.35	2.63	0.04
1950-2022	5240	-27.46	-0.38	2.63	0.04
1950-2022	5260	-22.22	-0.31	2.61	0.04
1950-2022	5280	-22.47	-0.31	2.61	0.04
1950-2022	5300	-20.63	-0.29	2.59	0.04
1950-2022	5320	-10.81	-0.15	2.60	0.04
1950-2022	5340	-6.34	-0.09	2.57	0.04
1950-2022	5360	-16.22	-0.23	2.58	0.04
1950-2022	5380	-13.68	-0.19	2.56	0.04
1950-2022	5400	-20.73	-0.29	2.57	0.04
1950-2022	5460	-0.49	-0.01	2.54	0.04
1950-2022	5480	0.13	0	2.55	0.04
1950-2022	5500	-2.39	-0.03	2.54	0.04
1950-2022	5660	-22.92	-0.32	2.50	0.03
1950-2022	5760	-25.01	-0.35	2.46	0.03
1950-2022	5820	-22.62	-0.32	2.45	0.03
1950-2022	5840	-25	-0.35	2.45	0.03
1950-2022	5900	-28.7	-0.4	2.43	0.03
1950-2022	5940	-20.39	-0.29	2.43	0.03
1950-2022	5960	-17.47	-0.24	2.43	0.03
1950-2022	5980	-24.99	-0.35	2.42	0.03
1950-2022	6020	-24.16	-0.34	2.41	0.03
1950-2022	6040	-24.56	-0.34	2.41	0.03
1950-2022	6060	-23.96	-0.34	2.41	0.03
1950-2022	6080	-22.1	-0.31	2.41	0.03
1950-2022	6100	-22.06	-0.31	2.40	0.03
1950-2022	6140	-56.91	-0.8	2.39	0.03
1950-2022	6160	-39.24	-0.55	2.39	0.03
1950-2022	6200	-7.23	-0.1	2.39	0.03
1950-2022	6260	-17.97	-0.25	2.39	0.03
1950-2022	6280	-25.99	-0.36	2.38	0.03
1950-2022	6300	-28.99	-0.41	2.38	0.03
1950-2022	6320	-19.92	-0.28	2.38	0.03
1950-2022	6420	-30.37	-0.43	2.37	0.03
1950-2022	6440	-9.87	-0.14	2.37	0.03
1950-2022	6460	-5.96	-0.08	2.37	0.03
1950-2022	6480	-19.26	-0.27	2.37	0.03
1950-2022	6780	-10.77	-0.15	2.42	0.03
1950-2022	6800	-19.47	-0.27	2.42	0.03
1950-2022	6820	-19.03	-0.27	2.42	0.03
1950-2022	6840	-16.17	-0.23	2.44	0.03
1950-2022	6860	-21.02	-0.29	2.43	0.03
1950-2022	6880	-31.21	-0.44	2.45	0.03
1950-2022	6900	-20	-0.28	2.47	0.03
1950-2022	6920	-19.95	-0.28	2.46	0.03
1950-2022	6940	-19.74	-0.28	2.48	0.03
1950-2022	6960	-17.54	-0.25	2.48	0.03
1950-2022	6980	-15.57	-0.22	2.49	0.03
1950-2022	7000	-16.75	-0.23	2.49	0.03
1950-2022	7020	-16.52	-0.23	2.49	0.03
1950-2022	7040	-15.92	-0.22	2.49	0.03
1950-2022	7060	-21.65	-0.3	2.50	0.03
1950-2022	7120	-7.13	-0.1	2.48	0.03
1950-2022	7140	-9.76	-0.14	2.48	0.03
1950-2022	7160	-4.51	-0.06	2.47	0.03
1950-2022	7200	-18.54	-0.26	2.44	0.03
1950-2022	7220	-13.32	-0.19	2.44	0.03
1950-2022	7240	-15.8	-0.22	2.42	0.03
1950-2022	7260	-11.3	-0.16	2.41	0.03
1950-2022	7280	-12.86	-0.18	2.39	0.03
1950-2022	7340	-3.17	-0.04	2.38	0.03
1950-2022	7360	-0.75	-0.01	2.34	0.03
1950-2022	7380	-1.72	-0.02	2.34	0.03
1950-2022	7520	-35	-0.49	2.23	0.03
1950-2022	7540	-61.5	-0.86	2.23	0.03
1950-2022	7560	-26.51	-0.37	2.21	0.03
1950-2022	7580	-22.11	-0.31	2.18	0.03
1950-2022	7620	-17.56	-0.25	2.15	0.03
1950-2022	7640	-21.96	-0.31	2.15	0.03
1950-2022	7660	-30.35	-0.42	2.15	0.03
1950-2022	7680	-22.75	-0.32	2.13	0.03
1950-2022	7700	-23.79	-0.33	2.13	0.03
1950-2022	7740	-34.82	-0.49	2.12	0.03
1950-2022	7760	-30.88	-0.43	2.11	0.03
1950-2022	7780	-16.11	-0.23	2.10	0.03
1950-2022	7800	-15.69	-0.22	2.09	0.03
1950-2022	7820	-21.8	-0.31	2.09	0.03
1950-2022	7840	-22.11	-0.31	2.08	0.03
1950-2022	7860	-21.41	-0.3	2.08	0.03
1950-2022	7880	-14.7	-0.21	2.08	0.03
1950-2022	7900	-14.9	-0.21	2.08	0.03
1950-2022	7920	-16.08	-0.23	2.08	0.03
1950-2022	7940	-4.87	-0.07	2.08	0.03
1950-2022	8000	-19.4	-0.27	2.08	0.03
1950-2022	8020	-23.09	-0.32	2.09	0.03
1950-2022	8040	-28.55	-0.4	2.09	0.03
1950-2022	8060	-35.4	-0.5	2.09	0.03
1950-2022	8080	-39.43	-0.55	2.09	0.03
1950-2022	8100	-33.62	-0.47	2.09	0.03
1950-2022	8120	-32.67	-0.46	2.09	0.03
1950-2022	8140	-33.38	-0.47	2.09	0.03
1950-2022	8200	-56.84	-0.8	2.09	0.03
1950-2022	8220	-53.43	-0.75	2.09	0.03
1950-2022	8240	-41.67	-0.58	2.09	0.03
1950-2022	8260	-33.47	-0.47	2.09	0.03
1950-2022	8280	-33.78	-0.47	2.09	0.03
1950-2022	8300	-20.89	-0.29	2.09	0.03
1950-2022	8320	-20.7	-0.29	2.09	0.03
1950-2015	4120	-4.6	-0.07	2.98	0.05
1950-2015	4140	2.68	0.04	2.98	0.05
1950-2015	4160	-1.57	-0.02	2.98	0.05
1950-2015	4180	2.61	0.04	2.98	0.05
1950-2015	4200	0.6	0.01	2.98	0.05
1950-2015	4220	-2.7	-0.04	2.96	0.05
1950-2015	4240	-2.39	-0.04	2.96	0.05
1950-2015	4260	-5.07	-0.08	2.96	0.05
1950-2015	4280	-7.07	-0.11	2.95	0.05
1950-2015	4300	-6.79	-0.11	2.95	0.05
1950-2015	4320	-9.44	-0.15	2.92	0.04
1950-2015	4340	-10.34	-0.16	2.92	0.04
1950-2015	4360	-3.95	-0.06	2.92	0.04
1950-2015	4380	-7.99	-0.12	2.92	0.04
1950-2015	4400	-9.59	-0.15	2.91	0.04
1950-2015	4420	-5.95	-0.09	2.91	0.04
1950-2015	4440	-6.94	-0.11	2.90	0.04
1950-2015	4720	-15.72	-0.24	2.68	0.04
1950-2015	4740	-13.53	-0.21	2.65	0.04
1950-2015	4760	1.58	0.02	2.69	0.04
1950-2015	4780	-3.17	-0.05	2.66	0.04
1950-2015	4800	-4.19	-0.07	2.66	0.04
1950-2015	4840	-3.55	-0.06	2.61	0.04
1950-2015	4860	-1.47	-0.02	2.61	0.04
1950-2015	4880	-1.69	-0.03	2.58	0.04
1950-2015	4900	-1.53	-0.02	2.55	0.04
1950-2015	4920	-0.8	-0.01	2.53	0.04
1950-2015	4940	-0.34	-0.01	2.53	0.04
1950-2015	4960	-1.31	-0.02	2.53	0.04
1950-2015	4980	-0.16	0	2.47	0.04
1950-2015	5000	-15.12	-0.23	2.45	0.04
1950-2015	5020	-6.06	-0.09	2.45	0.04
1950-2015	5040	-10.07	-0.16	2.42	0.04
1950-2015	5060	-10.43	-0.16	2.40	0.04
1950-2015	5080	-16.13	-0.25	2.38	0.04
1950-2015	5160	-2.98	-0.05	2.31	0.04
1950-2015	5180	-20	-0.31	2.31	0.04
1950-2015	5200	-19.85	-0.31	2.31	0.04
1950-2015	5220	-23.5	-0.37	2.27	0.03
1950-2015	5240	-26.17	-0.41	2.27	0.03
1950-2015	5260	-20.14	-0.31	2.25	0.03
1950-2015	5280	-18	-0.28	2.25	0.03
1950-2015	5300	-16.13	-0.25	2.23	0.03
1950-2015	5320	-5.38	-0.08	2.24	0.03
1950-2015	5340	-1.64	-0.03	2.20	0.03
1950-2015	5360	-11.36	-0.18	2.20	0.03
1950-2015	5380	-10.6	-0.16	2.18	0.03
1950-2015	5400	-13.9	-0.22	2.19	0.03
1950-2015	5460	-0.17	0	2.15	0.03
1950-2015	5480	-0.31	0	2.15	0.03
1950-2015	5500	0.5	0.01	2.15	0.03
1950-2015	5660	-16.73	-0.26	2.11	0.03
1950-2015	5760	-14.6	-0.23	2.09	0.03
1950-2015	5820	-20.99	-0.33	2.07	0.03
1950-2015	5840	-23.67	-0.37	2.09	0.03
1950-2015	5900	-21.8	-0.34	2.08	0.03
1950-2015	5940	-20.45	-0.32	2.07	0.03
1950-2015	5960	-16.91	-0.26	2.08	0.03
1950-2015	5980	-21.77	-0.34	2.08	0.03
1950-2015	6020	-16.04	-0.25	2.08	0.03
1950-2015	6040	-16.56	-0.26	2.08	0.03
1950-2015	6060	-18.88	-0.29	2.09	0.03
1950-2015	6080	-13.81	-0.21	2.09	0.03
1950-2015	6100	-22.27	-0.35	2.08	0.03
1950-2015	6140	-44.89	-0.7	2.09	0.03
1950-2015	6160	-33.95	-0.53	2.10	0.03
1950-2015	6200	-0.77	-0.01	2.09	0.03
1950-2015	6260	-17.26	-0.27	2.11	0.03
1950-2015	6280	-17.21	-0.27	2.12	0.03
1950-2015	6300	-26.67	-0.41	2.12	0.03
1950-2015	6320	-18.02	-0.28	2.14	0.03
1950-2015	6420	-20.76	-0.32	2.17	0.03
1950-2015	6440	-4.87	-0.08	2.16	0.03
1950-2015	6460	-0.17	0	2.19	0.03
1950-2015	6480	-17.64	-0.27	2.19	0.03
1950-2015	6780	-8.65	-0.13	2.24	0.03
1950-2015	6800	-18.03	-0.28	2.24	0.03
1950-2015	6820	-18.4	-0.29	2.21	0.03
1950-2015	6840	-15.41	-0.24	2.22	0.03
1950-2015	6860	-13.27	-0.21	2.22	0.03
1950-2015	6880	-17.37	-0.27	2.23	0.03
1950-2015	6900	-8.55	-0.13	2.24	0.03
1950-2015	6920	-10.04	-0.16	2.24	0.03
1950-2015	6940	-12.08	-0.19	2.25	0.03
1950-2015	6960	-8.05	-0.13	2.24	0.03
1950-2015	6980	-10.31	-0.16	2.25	0.03
1950-2015	7000	-7.84	-0.12	2.25	0.03
1950-2015	7020	-4.86	-0.08	2.25	0.03
1950-2015	7040	-3.88	-0.06	2.25	0.03
1950-2015	7060	-9.12	-0.14	2.25	0.03
1950-2015	7120	-1.63	-0.03	2.22	0.03
1950-2015	7140	-2.81	-0.04	2.22	0.03
1950-2015	7160	-3.04	-0.05	2.21	0.03
1950-2015	7200	-11.76	-0.18	2.18	0.03
1950-2015	7220	-7.54	-0.12	2.17	0.03
1950-2015	7240	-13.17	-0.2	2.15	0.03
1950-2015	7260	-6.66	-0.1	2.13	0.03
1950-2015	7280	-11.2	-0.17	2.11	0.03
1950-2015	7340	-2.69	-0.04	2.10	0.03
1950-2015	7360	0.05	0	2.06	0.03
1950-2015	7380	1.32	0.02	2.05	0.03
1950-2015	7520	-20.32	-0.32	1.86	0.03
1950-2015	7540	-43.01	-0.67	1.83	0.03
1950-2015	7560	-12.13	-0.19	1.80	0.03
1950-2015	7580	-11.08	-0.17	1.73	0.03
1950-2015	7620	-0.09	0	1.70	0.03
1950-2015	7640	-12.49	-0.19	1.69	0.03
1950-2015	7660	-27.54	-0.43	1.65	0.03
1950-2015	7680	-21.33	-0.33	1.63	0.03
1950-2015	7700	-22.54	-0.35	1.63	0.03
1950-2015	7740	-28.6	-0.44	1.57	0.02
1950-2015	7760	-12.2	-0.19	1.55	0.02
1950-2015	7780	-14.49	-0.23	1.51	0.02
1950-2015	7800	-13.52	-0.21	1.50	0.02
1950-2015	7820	-15.87	-0.25	1.51	0.02
1950-2015	7840	-20.67	-0.32	1.47	0.02
1950-2015	7860	-9.64	-0.15	1.47	0.02
1950-2015	7880	-9.85	-0.15	1.47	0.02
1950-2015	7900	-9.41	-0.15	1.46	0.02
1950-2015	7920	-8.92	-0.14	1.45	0.02
1950-2015	7940	-5.09	-0.08	1.47	0.02
1950-2015	8000	-19.96	-0.31	1.46	0.02
1950-2015	8020	-18.97	-0.29	1.47	0.02
1950-2015	8040	-28.42	-0.44	1.47	0.02
1950-2015	8060	-34.91	-0.54	1.46	0.02
1950-2015	8080	-33.77	-0.52	1.46	0.02
1950-2015	8100	-17.63	-0.27	1.46	0.02
1950-2015	8120	-31.27	-0.49	1.46	0.02
1950-2015	8140	-24.24	-0.38	1.48	0.02
1950-2015	8200	-52.01	-0.81	1.49	0.02
1950-2015	8220	-53.68	-0.83	1.50	0.02
1950-2015	8240	-41.67	-0.65	1.50	0.02
1950-2015	8260	-34.25	-0.53	1.51	0.02
1950-2015	8280	-33.9	-0.53	1.51	0.02
1950-2015	8300	-19.99	-0.31	1.51	0.02
1950-2015	8320	-12.92	-0.2	1.51	0.02
1966-2022	640	-9.77	-0.18	2.67	0.05
1966-2022	660	-5.33	-0.1	2.67	0.05
1966-2022	960	-2.22	-0.04	2.52	0.05
1966-2022	980	-0.34	-0.01	2.51	0.04
1966-2022	1080	-2.29	-0.04	2.47	0.04
1966-2022	1220	-15.47	-0.28	2.55	0.05
1966-2022	1240	-4.7	-0.08	2.55	0.05
1966-2022	1260	2.06	0.04	2.67	0.05
1966-2022	1280	-2.47	-0.04	2.68	0.05
1966-2022	1300	-9.23	-0.17	2.64	0.05
1966-2022	1320	-2.93	-0.05	2.62	0.05
1966-2022	1560	-2.17	-0.04	2.51	0.04
1966-2022	1580	-2.46	-0.04	2.51	0.04
1966-2022	1640	-5.54	-0.1	2.53	0.05
1966-2022	1660	-7.3	-0.13	2.53	0.05
1966-2022	1680	-2.91	-0.05	2.53	0.05
1966-2022	1700	-1.35	-0.02	2.53	0.05
1966-2022	1760	-3.13	-0.06	2.46	0.04
1966-2022	1780	-5.06	-0.09	2.43	0.04
1966-2022	1800	-7.61	-0.14	2.39	0.04
1966-2022	1820	-12.45	-0.22	2.38	0.04
1966-2022	1840	-3.51	-0.06	2.38	0.04
1966-2022	1860	-10.12	-0.18	2.36	0.04
1966-2022	1880	-2.8	-0.05	2.34	0.04
1966-2022	2080	-2.52	-0.05	2.32	0.04
1966-2022	2100	-1.05	-0.02	2.29	0.04
1966-2022	2120	-4.62	-0.08	2.25	0.04
1966-2022	2140	-5.19	-0.09	2.25	0.04
1966-2022	2200	-1.04	-0.02	2.21	0.04
1966-2022	2220	0.66	0.01	2.21	0.04
1966-2022	2240	-2.38	-0.04	2.14	0.04
1966-2022	2260	-1.7	-0.03	2.14	0.04
1966-2022	2280	-2.2	-0.04	2.14	0.04
1966-2022	2360	-6.21	-0.11	2.07	0.04
1966-2022	2380	-7.71	-0.14	2.07	0.04
1966-2022	2400	-0.69	-0.01	2.08	0.04
1966-2022	2420	-1.4	-0.03	2.00	0.04
1966-2022	2440	-1.22	-0.02	2.01	0.04
1966-2022	2460	-4.08	-0.07	2.02	0.04
1966-2022	2480	-4.6	-0.08	2.02	0.04
1966-2022	2500	-5.92	-0.11	2.00	0.04
1966-2022	2520	-4.34	-0.08	2.01	0.04
1966-2022	2540	-12.34	-0.22	1.99	0.04
1966-2022	2560	-10.19	-0.18	1.96	0.04
1966-2022	2580	-7.14	-0.13	1.98	0.04
1966-2022	2640	-4.47	-0.08	1.98	0.04
1966-2022	2660	-8.94	-0.16	1.98	0.04
1966-2022	2680	-11.79	-0.21	1.96	0.04
1966-2022	2700	-19.39	-0.35	1.98	0.04
1966-2022	2720	-14.45	-0.26	1.99	0.04
1966-2022	2740	-12.24	-0.22	2.01	0.04
1966-2022	2760	-20.03	-0.36	1.99	0.04
1966-2022	2780	-9.72	-0.17	2.01	0.04
1966-2022	2800	-4.82	-0.09	2.00	0.04
1966-2022	2840	-1.93	-0.03	2.03	0.04
1966-2022	2860	-9.51	-0.17	2.06	0.04
1966-2022	2900	-6.08	-0.11	2.09	0.04
1966-2022	2920	-2.55	-0.05	2.12	0.04
1966-2022	2980	-14.31	-0.26	2.10	0.04
1966-2022	3000	-9.38	-0.17	2.08	0.04
1966-2022	3020	-9.83	-0.18	2.04	0.04
1966-2022	3040	-5.64	-0.1	2.04	0.04
1966-2022	3060	-5.73	-0.1	1.99	0.04
1966-2022	3080	-1.14	-0.02	1.90	0.03
1966-2022	3100	-4.56	-0.08	1.83	0.03
1966-2022	3120	-1.5	-0.03	1.81	0.03
1966-2022	3140	-7.63	-0.14	1.75	0.03
1966-2022	3160	-7.82	-0.14	1.67	0.03
1966-2022	3180	-0.8	-0.01	1.64	0.03
1966-2022	3200	0.21	0	1.60	0.03
1966-2022	3220	-7.48	-0.13	1.57	0.03
1966-2022	3240	-4.51	-0.08	1.54	0.03
1966-2022	3260	-3.65	-0.07	1.47	0.03
1966-2022	3280	-16.54	-0.3	1.47	0.03
1966-2022	3300	-24.45	-0.44	1.50	0.03
1966-2022	3320	-14.29	-0.26	1.52	0.03
1966-2022	3340	-3.36	-0.06	1.53	0.03
1966-2022	3520	-8.23	-0.15	1.80	0.03
1966-2022	3560	-6.64	-0.12	1.82	0.03
1966-2022	3660	-15.71	-0.28	1.92	0.03
1966-2022	3680	-16.5	-0.3	1.94	0.03
1966-2022	3700	-14.06	-0.25	1.99	0.04
1966-2022	3740	-13.7	-0.25	2.03	0.04
1966-2022	3760	-21.49	-0.39	2.17	0.04
1966-2022	3780	-11.01	-0.2	2.48	0.04
1966-2022	3800	-4.36	-0.08	2.45	0.04
1966-2022	3840	-2.05	-0.04	2.25	0.04
1966-2022	3860	-0.41	-0.01	2.20	0.04
1966-2022	3880	0.39	0.01	2.13	0.04
1966-2022	3900	1.35	0.02	2.08	0.04
1966-2022	3920	0.01	0	2.09	0.04
1966-2022	3940	-4.26	-0.08	2.02	0.04
1966-2022	3960	-8.9	-0.16	2.07	0.04
1966-2022	3980	-10.31	-0.18	2.21	0.04
1966-2022	4020	0.27	0	2.49	0.04
1966-2022	4040	-0.13	0	2.50	0.04
1966-2022	4060	0.39	0.01	2.50	0.04
1966-2022	4080	-0.37	-0.01	2.51	0.04
1966-2022	4100	-7.67	-0.14	2.54	0.05
1966-2022	4120	-2.74	-0.05	2.69	0.05
1966-2022	4140	-1.86	-0.03	2.57	0.05
1966-2022	4160	-1.69	-0.03	2.31	0.04
1966-2022	4180	1.02	0.02	2.21	0.04
1966-2022	4200	1.46	0.03	2.21	0.04
1966-2022	4220	-1.82	-0.03	2.30	0.04
1966-2022	4240	-3.89	-0.07	2.34	0.04
1966-2022	4260	-5.63	-0.1	2.36	0.04
1966-2022	4280	-10.1	-0.18	2.37	0.04
1966-2022	4300	-11.11	-0.2	2.38	0.04
1966-2022	4320	-10.88	-0.2	2.38	0.04
1966-2022	4340	-7.07	-0.13	2.38	0.04
1966-2022	4360	-4.6	-0.08	2.38	0.04
1966-2022	4380	-5.7	-0.1	2.39	0.04
1966-2022	4400	-9.59	-0.17	2.39	0.04
1966-2022	4420	-6.41	-0.11	2.39	0.04
1966-2022	4440	-5.55	-0.1	2.38	0.04
1966-2022	4700	0.64	0.01	2.57	0.05
1966-2022	4720	-25.17	-0.45	2.60	0.05
1966-2022	4740	-19.1	-0.34	2.64	0.05
1966-2022	4760	-3.92	-0.07	2.65	0.05
1966-2022	4780	0.63	0.01	2.70	0.05
1966-2022	4800	-2.68	-0.05	2.72	0.05
1966-2022	4840	0.83	0.01	2.80	0.05
1966-2022	4860	-0.65	-0.01	2.86	0.05
1966-2022	4880	-0.85	-0.02	2.97	0.05
1966-2022	4900	0.2	0	2.95	0.05
1966-2022	4920	-0.01	0	3.10	0.06
1966-2022	4940	0.12	0	3.10	0.06
1966-2022	4960	-0.74	-0.01	3.30	0.06
1966-2022	4980	-0.22	0	3.12	0.06
1966-2022	5000	-19.77	-0.35	3.23	0.06
1966-2022	5020	-16.66	-0.3	2.12	0.04
1966-2022	5040	-13.78	-0.25	2.12	0.04
1966-2022	5060	-12.15	-0.22	2.14	0.04
1966-2022	5080	-9.59	-0.17	2.23	0.04
1966-2022	5160	-9.02	-0.16	2.43	0.04
1966-2022	5180	-9.6	-0.17	2.43	0.04
1966-2022	5200	-14.6	-0.26	2.45	0.04
1966-2022	5220	-11.7	-0.21	2.44	0.04
1966-2022	5240	-18.23	-0.33	2.44	0.04
1966-2022	5260	-8.8	-0.16	2.46	0.04
1966-2022	5280	-14.09	-0.25	2.46	0.04
1966-2022	5300	-10.26	-0.18	2.46	0.04
1966-2022	5320	-3.77	-0.07	2.49	0.04
1966-2022	5340	-6.34	-0.11	2.51	0.04
1966-2022	5360	-6.36	-0.11	2.52	0.05
1966-2022	5380	-8.58	-0.15	2.55	0.05
1966-2022	5400	-12.15	-0.22	2.56	0.05
1966-2022	5460	0.39	0.01	2.60	0.05
1966-2022	5480	0.13	0	2.60	0.05
1966-2022	5500	-0.36	-0.01	2.64	0.05
1966-2022	5660	-15.26	-0.27	2.74	0.05
1966-2022	5760	-15.99	-0.29	2.84	0.05
1966-2022	5820	-22.52	-0.4	2.84	0.05
1966-2022	5840	-12.63	-0.23	2.88	0.05
1966-2022	5900	-12.94	-0.23	2.92	0.05
1966-2022	5940	-9.27	-0.17	2.91	0.05
1966-2022	5960	-14.59	-0.26	2.95	0.05
1966-2022	5980	-19.28	-0.35	2.95	0.05
1966-2022	6020	-10.89	-0.2	2.98	0.05
1966-2022	6040	-13.37	-0.24	2.98	0.05
1966-2022	6060	-16.28	-0.29	2.98	0.05
1966-2022	6080	-14.19	-0.25	3.01	0.05
1966-2022	6100	1.44	0.03	3.01	0.05
1966-2022	6120	-3.28	-0.06	3.01	0.05
1966-2022	6140	-28.26	-0.51	3.03	0.05
1966-2022	6160	-16.24	-0.29	3.00	0.05
1966-2022	6200	-7.23	-0.13	3.00	0.05
1966-2022	6260	-10.01	-0.18	2.98	0.05
1966-2022	6280	-14.29	-0.26	3.02	0.05
1966-2022	6300	-17.9	-0.32	3.02	0.05
1966-2022	6320	-16	-0.29	3.02	0.05
1966-2022	6420	-20.15	-0.36	2.98	0.05
1966-2022	6440	-11.48	-0.21	2.98	0.05
1966-2022	6500	-2.19	-0.04	2.94	0.05
1966-2022	6520	-1.58	-0.03	2.94	0.05
1966-2022	6540	-14.52	-0.26	2.92	0.05
1966-2022	6620	-17.79	-0.32	2.88	0.05
1966-2022	6640	-12.53	-0.22	2.88	0.05
1966-2022	6660	-14.23	-0.26	2.86	0.05
1966-2022	6680	-16.34	-0.29	2.86	0.05
1966-2022	6780	-6.74	-0.12	2.83	0.05
1966-2022	6800	-8.83	-0.16	2.82	0.05
1966-2022	6820	-8.33	-0.15	2.82	0.05
1966-2022	6840	-6.59	-0.12	2.82	0.05
1966-2022	6860	-13.12	-0.24	2.80	0.05
1966-2022	6880	-23.38	-0.42	2.80	0.05
1966-2022	6900	-16.27	-0.29	2.80	0.05
1966-2022	6920	-12.6	-0.23	2.79	0.05
1966-2022	6940	-15.12	-0.27	2.79	0.05
1966-2022	6960	-12.82	-0.23	2.79	0.05
1966-2022	6980	-8.89	-0.16	2.78	0.05
1966-2022	7000	-13.06	-0.23	2.78	0.05
1966-2022	7020	-14.62	-0.26	2.78	0.05
1966-2022	7040	-15.35	-0.28	2.77	0.05
1966-2022	7060	-20.09	-0.36	2.77	0.05
1966-2022	7120	-3.89	-0.07	2.77	0.05
1966-2022	7140	-8.99	-0.16	2.78	0.05
1966-2022	7160	-2.46	-0.04	2.78	0.05
1966-2022	7200	-15.19	-0.27	2.78	0.05
1966-2022	7220	-13.32	-0.24	2.79	0.05
1966-2022	7240	-15.85	-0.28	2.79	0.05
1966-2022	7260	-7.51	-0.13	2.80	0.05
1966-2022	7280	-4.41	-0.08	2.80	0.05
1966-2022	7340	-3.75	-0.07	2.82	0.05
1966-2022	7360	-0.75	-0.01	2.82	0.05
1966-2022	7380	-2.26	-0.04	2.82	0.05
1966-2022	7520	-23.36	-0.42	2.87	0.05
1966-2022	7540	-49.25	-0.88	2.87	0.05
1966-2022	7560	-24.14	-0.43	2.89	0.05
1966-2022	7580	-14.9	-0.27	2.89	0.05
1966-2022	7620	-17.85	-0.32	2.91	0.05
1966-2022	7640	-20.73	-0.37	2.91	0.05
1966-2022	7660	-24.84	-0.45	2.91	0.05
1966-2022	7680	-8.25	-0.15	2.92	0.05
1966-2022	7700	-2.55	-0.05	2.92	0.05
1966-2022	7740	-16.78	-0.3	2.94	0.05
1966-2022	7760	-27.42	-0.49	2.94	0.05
1966-2022	7780	-15.47	-0.28	2.94	0.05
1966-2022	7800	-15.85	-0.28	2.95	0.05
1966-2022	7820	-19.01	-0.34	2.95	0.05
1966-2022	7840	-20.37	-0.37	2.95	0.05
1966-2022	7860	-19.85	-0.36	2.94	0.05
1966-2022	7880	-13.12	-0.24	2.94	0.05
1966-2022	7900	-14.05	-0.25	2.94	0.05
1966-2022	7920	-12.87	-0.23	2.94	0.05
1966-2022	7940	-3.75	-0.07	2.95	0.05
1966-2022	8000	-9.91	-0.18	2.94	0.05
1966-2022	8020	-10.97	-0.2	2.94	0.05
1966-2022	8040	-13.56	-0.24	2.94	0.05
1966-2022	8060	-13.92	-0.25	2.93	0.05
1966-2022	8080	-35.86	-0.64	2.93	0.05
1966-2022	8100	-31.8	-0.57	2.93	0.05
1966-2022	8120	-31.21	-0.56	2.93	0.05
1966-2022	8140	-23.03	-0.41	2.93	0.05
1966-2022	8200	-39.04	-0.7	2.91	0.05
1966-2022	8220	-30.97	-0.56	2.91	0.05
1966-2022	8240	-23.62	-0.42	2.91	0.05
1966-2022	8260	-16.03	-0.29	2.90	0.05
1966-2022	8280	-15.92	-0.29	2.89	0.05
1966-2022	8300	-16.25	-0.29	2.89	0.05
1966-2022	8320	-19.63	-0.35	2.88	0.05
1966-2015	500	-1.63	-0.03	2.61	0.05
1966-2015	640	-10.05	-0.21	2.56	0.05
1966-2015	660	-5.16	-0.11	2.56	0.05
1966-2015	820	-5.38	-0.11	2.52	0.05
1966-2015	960	-3.71	-0.08	2.53	0.05
1966-2015	980	-0.13	0	2.53	0.05
1966-2015	1080	-2.33	-0.05	2.53	0.05
1966-2015	1220	-8.08	-0.17	2.53	0.05
1966-2015	1760	-1.68	-0.03	2.48	0.05
1966-2015	1780	-0.09	0	2.48	0.05
1966-2015	1800	-4.2	-0.09	2.47	0.05
1966-2015	1820	-8.41	-0.17	2.47	0.05
1966-2015	1840	-0.66	-0.01	2.47	0.05
1966-2015	1860	1.04	0.02	2.46	0.05
1966-2015	2080	-2.48	-0.05	2.39	0.05
1966-2015	2200	0.99	0.02	2.29	0.05
1966-2015	2360	0	0	2.13	0.04
1966-2015	2380	1.36	0.03	2.11	0.04
1966-2015	2400	1.37	0.03	2.11	0.04
1966-2015	2440	1.63	0.03	2.04	0.04
1966-2015	2460	-3.58	-0.07	2.03	0.04
1966-2015	2480	0.22	0	2.03	0.04
1966-2015	2500	-4.46	-0.09	1.99	0.04
1966-2015	2520	-2.15	-0.04	1.98	0.04
1966-2015	2540	-2.49	-0.05	1.94	0.04
1966-2015	2560	-0.09	0	1.90	0.04
1966-2015	2580	-7.14	-0.15	1.90	0.04
1966-2015	2640	0.74	0.02	1.83	0.04
1966-2015	2660	-2.68	-0.06	1.81	0.04
1966-2015	2680	-8.18	-0.17	1.78	0.04
1966-2015	2700	-5.33	-0.11	1.76	0.04
1966-2015	2720	-9.94	-0.2	1.74	0.04
1966-2015	2740	-1.79	-0.04	1.74	0.04
1966-2015	2760	-18.99	-0.39	1.71	0.03
1966-2015	2780	-3.23	-0.07	1.69	0.03
1966-2015	2800	-1.64	-0.03	1.67	0.03
1966-2015	2900	-2.01	-0.04	1.59	0.03
1966-2015	2920	1.08	0.02	1.59	0.03
1966-2015	2980	-13.34	-0.27	1.56	0.03
1966-2015	3000	-2.22	-0.05	1.54	0.03
1966-2015	3020	-7.88	-0.16	1.53	0.03
1966-2015	3040	-5.9	-0.12	1.53	0.03
1966-2015	3060	-5.06	-0.1	1.53	0.03
1966-2015	3080	-1.22	-0.02	1.52	0.03
1966-2015	3100	-4.31	-0.09	1.52	0.03
1966-2015	3120	0.22	0	1.52	0.03
1966-2015	3140	-6.58	-0.14	1.52	0.03
1966-2015	3160	-6.63	-0.14	1.49	0.03
1966-2015	3180	0.4	0.01	1.49	0.03
1966-2015	3200	0.27	0.01	1.46	0.03
1966-2015	3220	-2.6	-0.05	1.45	0.03
1966-2015	3240	-2.65	-0.05	1.45	0.03
1966-2015	3260	-1.33	-0.03	1.40	0.03
1966-2015	3280	-16.9	-0.35	1.40	0.03
1966-2015	3300	-24.55	-0.5	1.43	0.03
1966-2015	3320	-14.24	-0.29	1.43	0.03
1966-2015	3520	-3.59	-0.07	1.51	0.03
1966-2015	3660	-15.84	-0.33	1.59	0.03
1966-2015	3680	-16.21	-0.33	1.59	0.03
1966-2015	3700	-13.15	-0.27	1.61	0.03
1966-2015	3740	-3.73	-0.08	1.61	0.03
1966-2015	3760	-7.21	-0.15	1.62	0.03
1966-2015	3780	-9.42	-0.19	1.63	0.03
1966-2015	3800	-4.04	-0.08	1.65	0.03
1966-2015	3840	-1.78	-0.04	1.65	0.03
1966-2015	3860	0.78	0.02	1.66	0.03
1966-2015	3880	0.28	0.01	1.66	0.03
1966-2015	3900	0.78	0.02	1.66	0.03
1966-2015	3920	0.66	0.01	1.68	0.03
1966-2015	3940	-3.28	-0.07	1.68	0.03
1966-2015	3960	-7.65	-0.16	1.68	0.03
1966-2015	3980	-6.43	-0.13	1.69	0.03
1966-2015	4040	1.65	0.03	1.69	0.03
1966-2015	4100	-4.52	-0.09	1.70	0.03
1966-2015	4120	0.47	0.01	1.71	0.03
1966-2015	4160	0.65	0.01	1.71	0.03
1966-2015	4220	-0.49	-0.01	1.72	0.04
1966-2015	4240	-2.39	-0.05	1.72	0.04
1966-2015	4260	-2.94	-0.06	1.73	0.04
1966-2015	4280	-5.75	-0.12	1.73	0.04
1966-2015	4300	-6.09	-0.13	1.74	0.04
1966-2015	4320	-5.48	-0.11	1.74	0.04
1966-2015	4340	-2.54	-0.05	1.74	0.04
1966-2015	4360	-0.97	-0.02	1.75	0.04
1966-2015	4380	-2.93	-0.06	1.76	0.04
1966-2015	4400	-7.5	-0.15	1.76	0.04
1966-2015	4420	-4.72	-0.1	1.76	0.04
1966-2015	4700	-2.86	-0.06	1.85	0.04
1966-2015	4720	-8.92	-0.18	1.85	0.04
1966-2015	4740	-0.35	-0.01	1.86	0.04
1966-2015	4780	-0.17	0	1.86	0.04
1966-2015	4800	-3.44	-0.07	1.88	0.04
1966-2015	4840	0.17	0	1.87	0.04
1966-2015	4860	-0.73	-0.01	1.90	0.04
1966-2015	4880	-1.07	-0.02	1.90	0.04
1966-2015	4900	0.91	0.02	1.90	0.04
1966-2015	4920	0.24	0.01	1.91	0.04
1966-2015	4940	1.15	0.02	1.91	0.04
1966-2015	4960	1.23	0.03	1.91	0.04
1966-2015	4980	0.94	0.02	1.93	0.04
1966-2015	5000	-10.76	-0.22	1.94	0.04
1966-2015	5020	-5.27	-0.11	1.94	0.04
1966-2015	5040	-4.01	-0.08	1.95	0.04
1966-2015	5060	-1.04	-0.02	1.98	0.04
1966-2015	5080	-6.92	-0.14	1.98	0.04
1966-2015	5160	-0.93	-0.02	2.01	0.04
1966-2015	5180	-7.96	-0.16	2.01	0.04
1966-2015	5200	-13.2	-0.27	2.05	0.04
1966-2015	5220	-10.52	-0.22	2.05	0.04
1966-2015	5240	-16.95	-0.35	2.05	0.04
1966-2015	5260	-6.72	-0.14	2.08	0.04
1966-2015	5280	-9.61	-0.2	2.08	0.04
1966-2015	5300	-5.76	-0.12	2.08	0.04
1966-2015	5320	1.66	0.03	2.12	0.04
1966-2015	5340	-1.64	-0.03	2.13	0.04
1966-2015	5360	-1.5	-0.03	2.13	0.04
1966-2015	5380	-5.5	-0.11	2.16	0.04
1966-2015	5400	-5.33	-0.11	2.17	0.04
1966-2015	5460	0.71	0.01	2.22	0.05
[truncated: 135 more rows]
