# Supplementary material for: Earthquake contributions to coastal cliff retreat
Source: Copernicus journal article supplement (doi:10.5194/esurf-11-757-2023), 2023-08-09
Supplement: Supplementary file 1 [file esurf-11-757-2023-supplement.zip › esurf-11-757-2023-supplement-title-page.pdf]

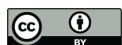

## *Supplement of*

## **Earthquake contributions to coastal cliff retreat**

**Colin K. Bloom et al.**

*Correspondence to:* Colin K. Bloom ([colin.bloom@pg.canterbury.ac.nz](mailto:colin.bloom@pg.canterbury.ac.nz))

- [esurf-11-757-2023-supplement-title-page.pdf](#)
- [Conway\\_Retreat\\_Data.csv](#)

The copyright of individual parts of the supplement might differ from the article licence.
